# Supplementary material
Source: PubMed Central journal article supplement (PMC9649891)
Supplement: NIHMS1841814-supplement-1.pdf [file NIHMS1841814-supplement-1.pdf]

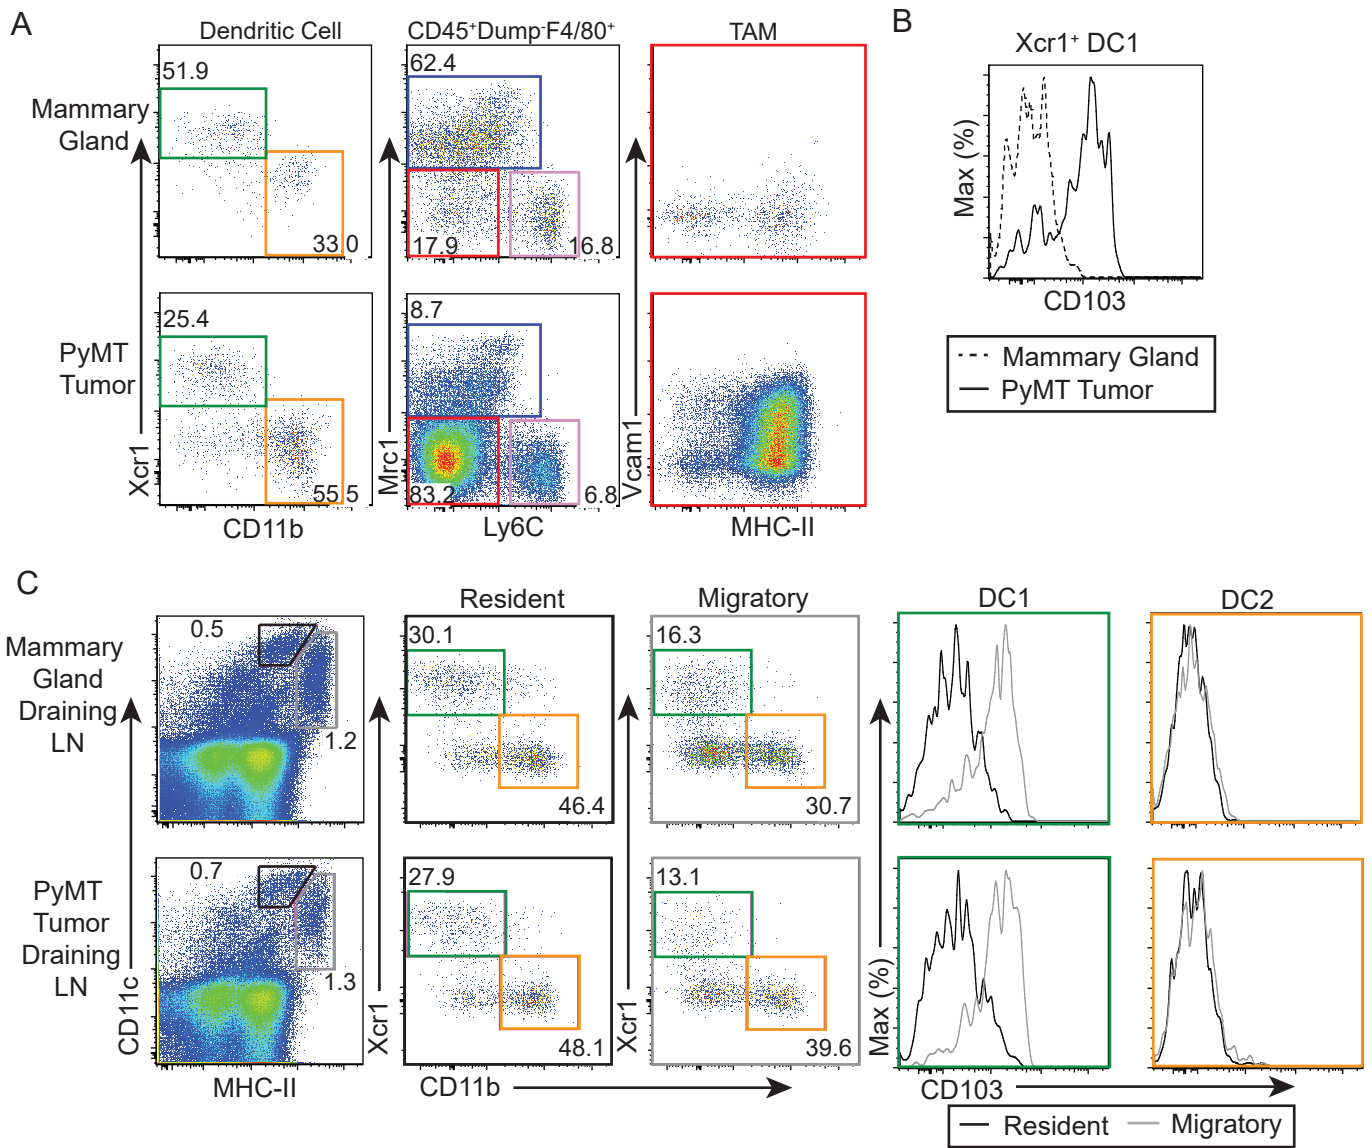

**Figure S1. Mononuclear phagocytic cells of the mammary gland, tumor and their draining lymph nodes, related to Figure 1.**

(A) Flow cytometric gating strategy for mononuclear phagocytes in mammary gland and PyMT tumor: DC1s (green, CD45<sup>+</sup>Lin<sup>-</sup>F4/80<sup>-</sup>Ly6C<sup>-</sup>CD11c<sup>+</sup>MHC-II<sup>+</sup>Xcr1<sup>+</sup>), DC2s (orange, CD45<sup>+</sup>Lin<sup>-</sup>F4/80<sup>-</sup>Ly6C<sup>-</sup>CD11c<sup>+</sup>MHC-II<sup>+</sup>CD11b<sup>+</sup>), monocytes (pink, CD45<sup>+</sup>Lin<sup>-</sup>F4/80<sup>+</sup>Ly6C<sup>+</sup>CD11b<sup>+</sup>), MTMs (blue, CD45<sup>+</sup>Lin<sup>-</sup>F4/80<sup>+</sup>Ly6C<sup>-</sup>Mrc1<sup>+</sup>) and TAMs (red, CD45<sup>+</sup>Lin<sup>-</sup>F4/80<sup>+</sup>Ly6C<sup>-</sup>Mrc1<sup>-</sup>) (Lin = Ly6G, B220, SiglecF, dead cells). Expression of Vcam1 and MHC-II on TAMs is also displayed.

(B) CD103 expression on Xcr1<sup>+</sup> DC1s from mammary gland (dashed line) and tumor (solid line).

(C) Representative flow cytometric plots for resident (black, CD11c<sup>high</sup>MHCII<sup>int</sup>) and migratory (gray, CD11c<sup>+</sup>MHC-II<sup>high</sup>) DC1s (XCR1<sup>+</sup>) and DC2s (CD11b<sup>+</sup>) in mammary gland- or tumor-draining lymph node. Expression of CD103 in lymph node DC populations is shown for non-tumor bearing and tumor bearing mice. Data is representative of at least 3 independent experiments.

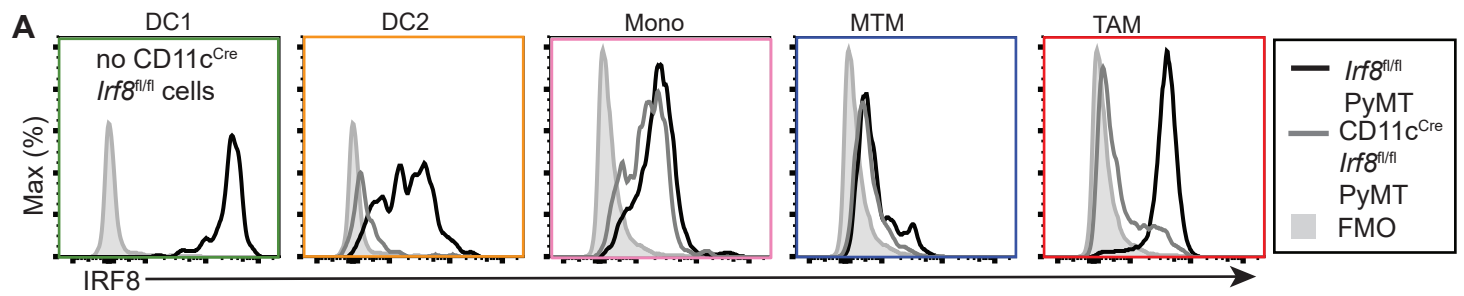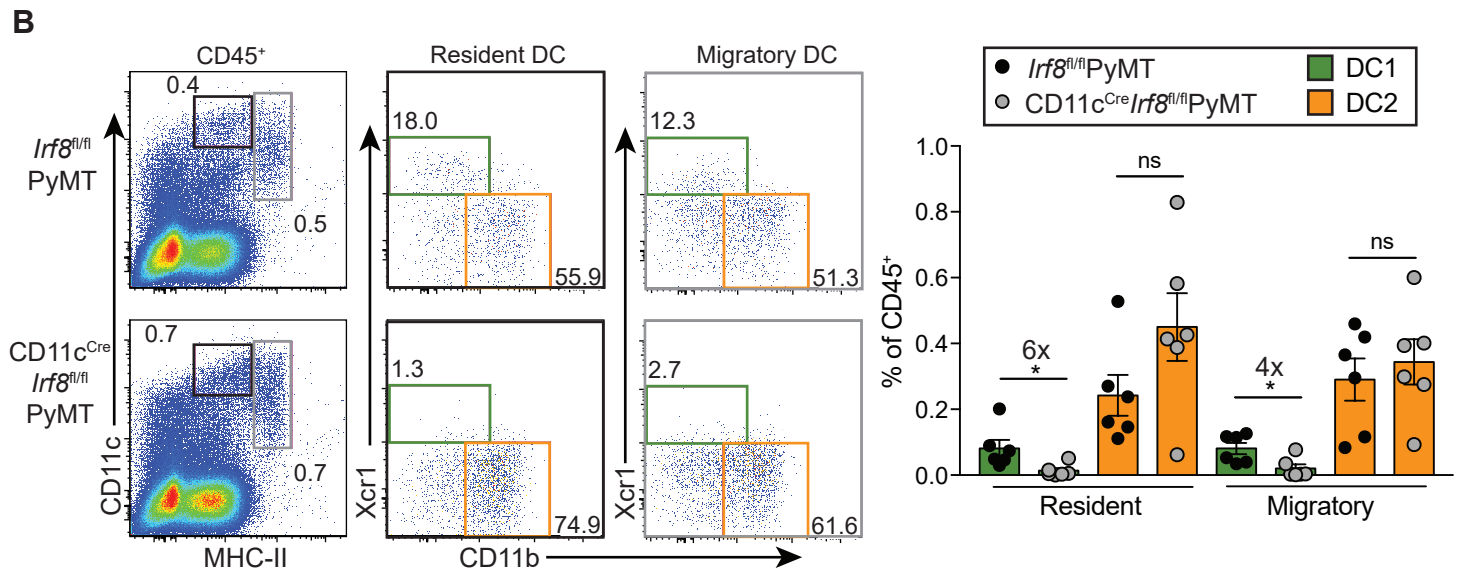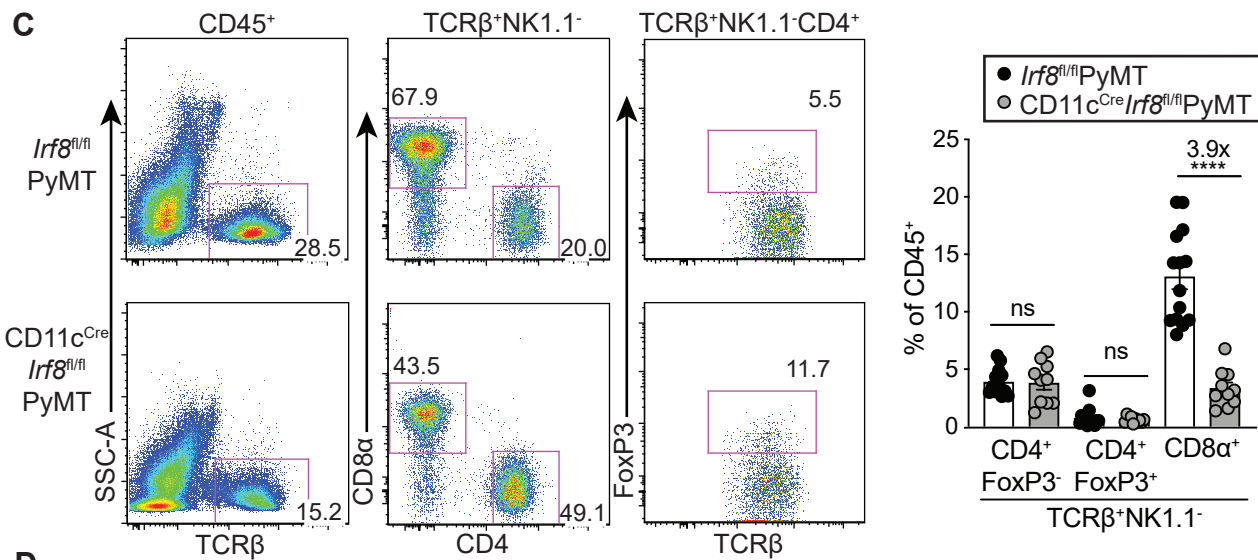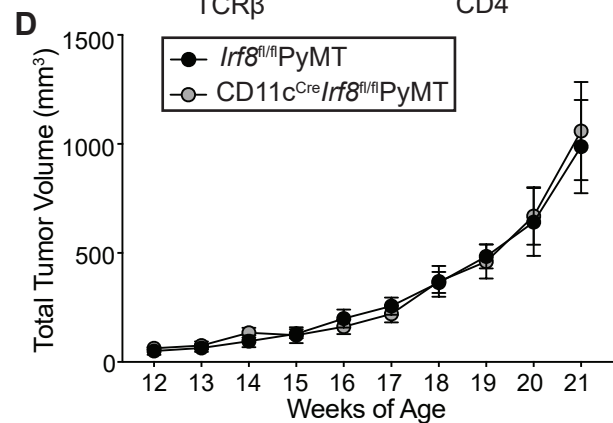

**Figure S2. Leukocyte populations in tumor and tumor-draining lymph nodes of CD11c<sup>Cre</sup>*Irf8*<sup>fl/fl</sup>PyMT mice, related to Figure 2.**

(A) IRF8 protein expression as determined by flow cytometric analysis in DC1s, DC2s, monocytes, MTMs and TAMs from tumors in *Irf8*<sup>fl/fl</sup>PyMT (black line) and CD11c<sup>Cre</sup>*Irf8*<sup>fl/fl</sup>PyMT (gray line) mice. No CD11c<sup>Cre</sup>*Irf8*<sup>fl/fl</sup> DC1 cells were detected; fluorescence minus one (FMO) sample unstained for IRF8 in shaded gray.

(B) Representative flow cytometric gating and quantification of tumor-draining lymph nodes in *Irf8*<sup>fl/fl</sup>PyMT (black circles) and CD11c<sup>Cre</sup>*Irf8*<sup>fl/fl</sup>PyMT (gray circles) mice (n=6 per group), resident DC (black box), migratory DC (gray box), DC1 (green bar) and DC2 (orange bar).

(C) Representative flow plots and quantification of tumor-infiltrating T lymphocyte populations in *Irf8*<sup>fl/fl</sup>PyMT and CD11c<sup>Cre</sup>*Irf8*<sup>fl/fl</sup>PyMT mice. Each circle represents one mouse, data displayed as mean +/- SEM, fold change value of DCs from *Irf8*<sup>fl/fl</sup>PyMT versus CD11c<sup>Cre</sup>*Irf8*<sup>fl/fl</sup>PyMT mice are displayed above significant comparisons (unpaired student's t test, two-tailed, \* = p<0.05, \*\*\*\* = p<0.0001).

(D) Tumor growth curves from CD11c<sup>Cre</sup>*Irf8*<sup>fl/fl</sup>PyMT (n=11) and littermate and cagemate *Irf8*<sup>fl/fl</sup>PyMT controls (n=8) (2-way ANOVA, not significant).

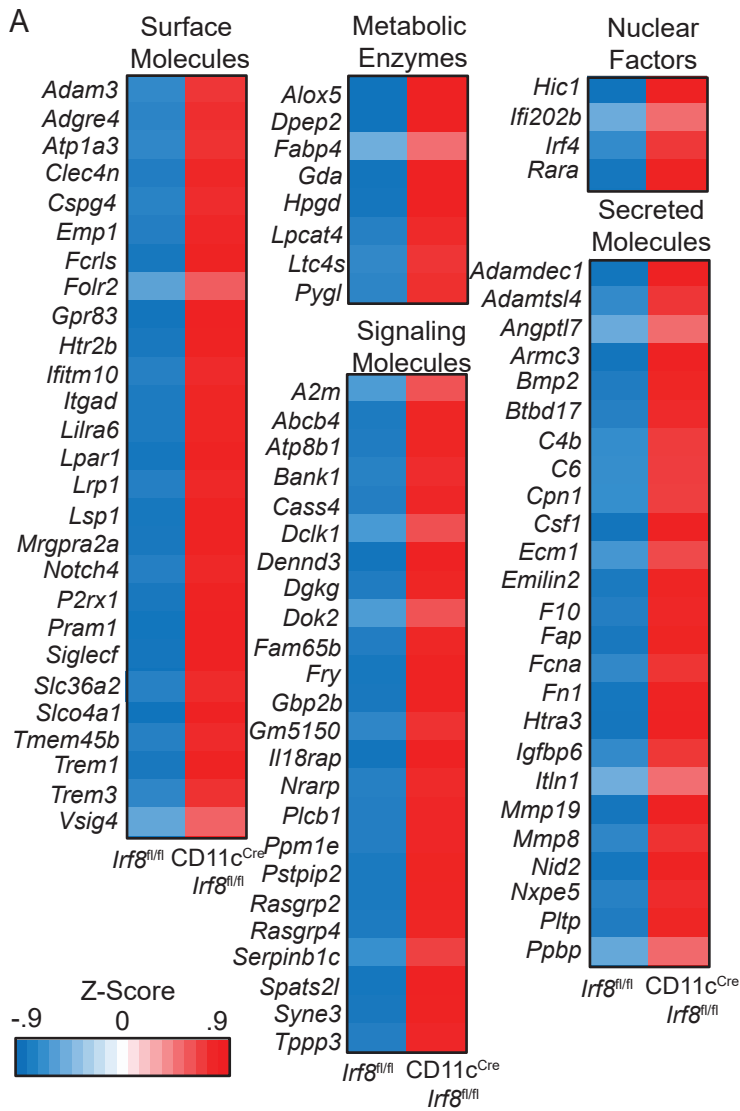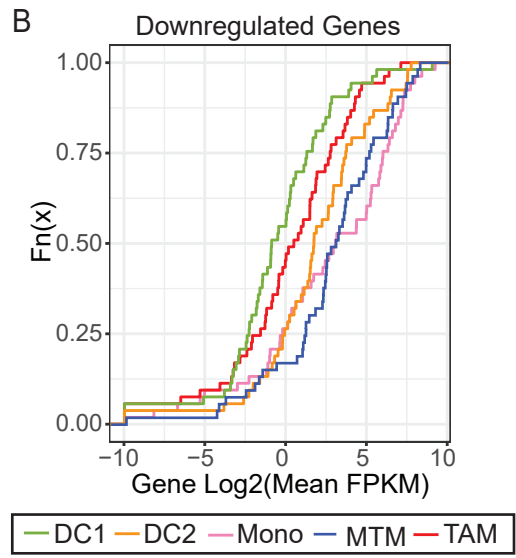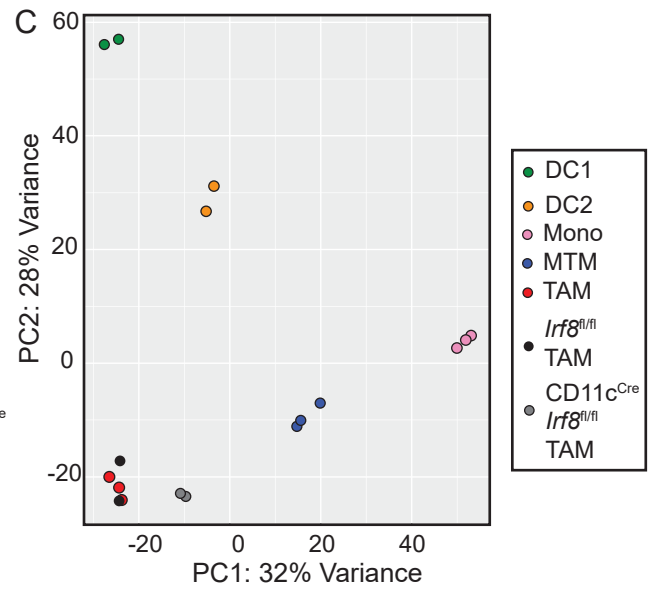

**Figure S3. IRF8-dependent gene expression in TAMs, related to Figure 3.**

(A) Average z-score of genes significantly upregulated in TAMs sorted from tumors of *Irf8<sup>fl/fl</sup>*PyMT and CD11c<sup>Cre</sup>*Irf8<sup>fl/fl</sup>*PyMT mice. RNA was extracted and sequenced. Genes were grouped based on cell localization and function, excluding genes with unknown functions, pseudogenes and noncoding RNAs (*Art2a-ps*, *Nhs12*, *Tmem181c-ps*, and *4933400F21Rik*) (base mean > 50, FDR < 0.05, log<sub>2</sub> fold change > 2).

(B) CDF plot displaying enrichment of IRF8-repressed gene signatures in PyMT tumor DC1 (green), DC2 (orange), monocyte (pink), MTM (blue), and TAM (red) RNAseq datasets from Figure 1.

(C) Principal component analysis performed in Figure 1B, now displaying two *Irf8<sup>fl/fl</sup>* and CD11c<sup>Cre</sup>*Irf8<sup>fl/fl</sup>* TAM pairs along with 5 groups of mononuclear phagocytes from PyMT tumors.

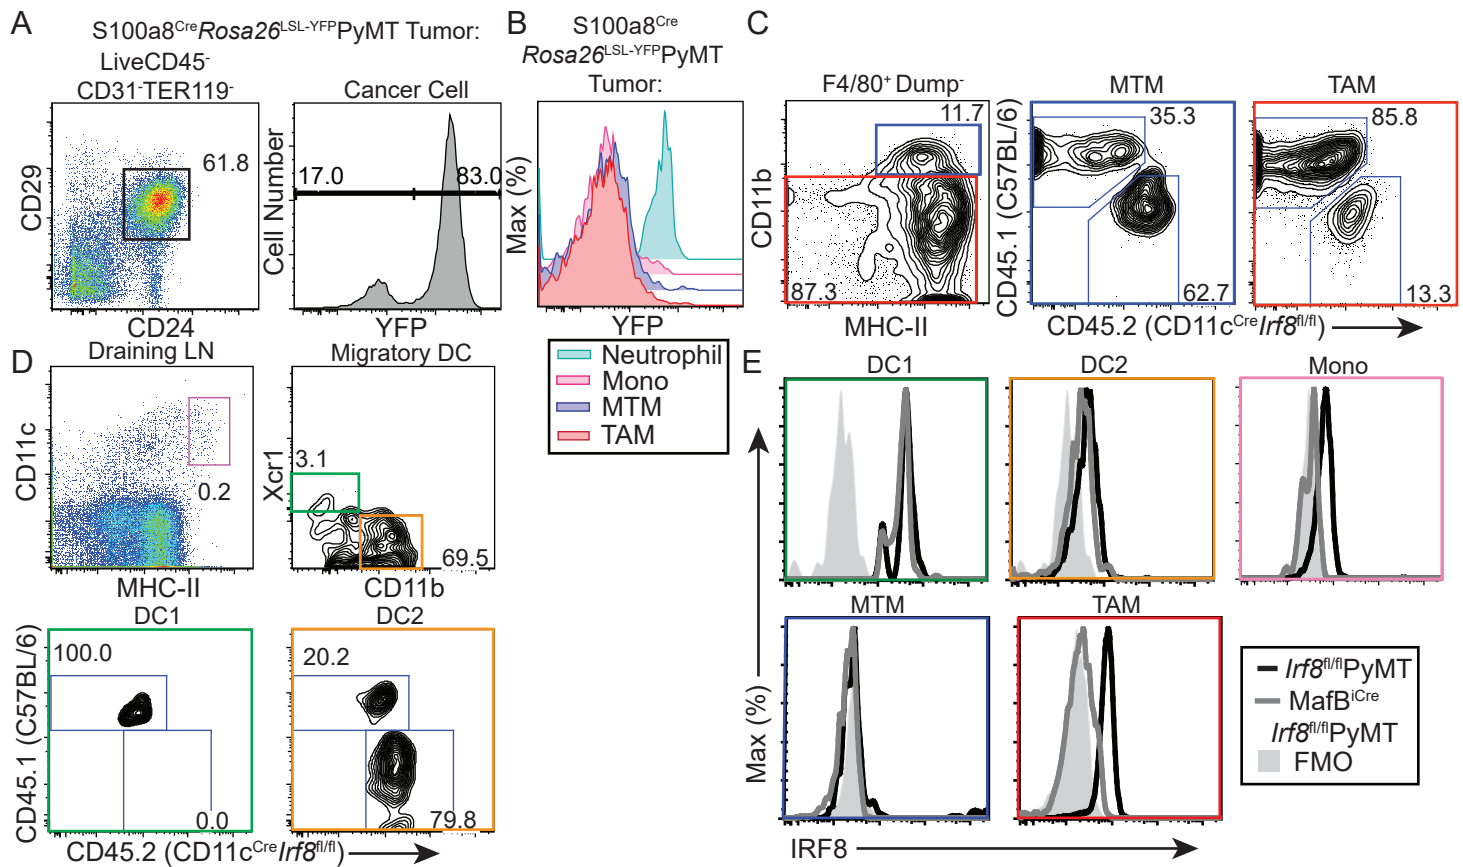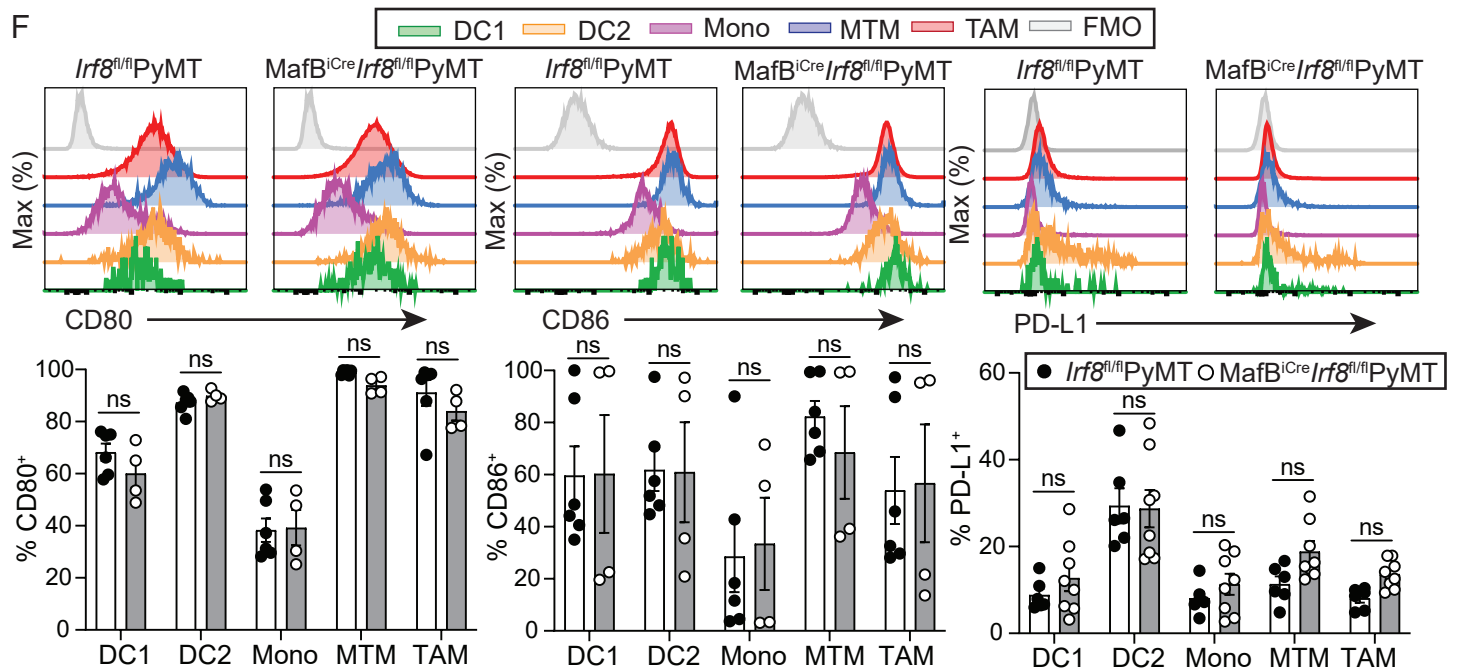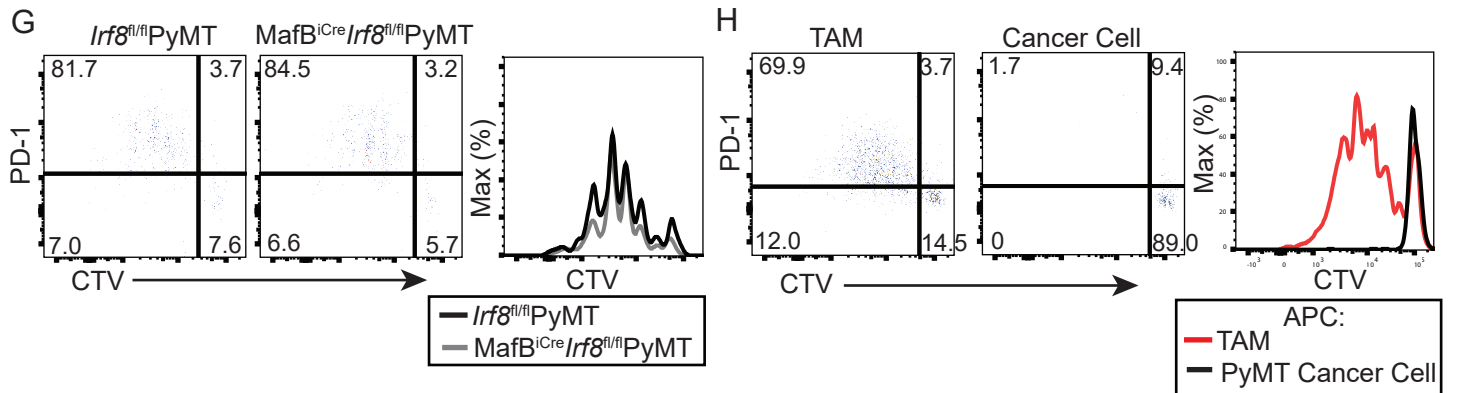

**Figure S4. Exploring the role of IRF8 in mixed bone marrow chimeras and upon deletion via macrophage-specific MafB<sup>iCre</sup> mice, related to Figures 4 to 5**

(A) Reporter for Cre activity (YFP expression) in PyMT cancer cells (CD45<sup>+</sup>CD31<sup>-</sup>TER119<sup>-</sup>CD24<sup>+</sup>CD29<sup>+</sup>) of S100a8<sup>Cre</sup>Rosa26<sup>LSL-YFP</sup>PyMT mice.

(B) Reporter for Cre activity (YFP expression) in tumor-infiltrating immune cells, including TAMs (red), MTMs (dark blue), monocytes (pink) and neutrophils (light blue, CD45<sup>+</sup>Ly6G<sup>+</sup>Ly6C<sup>+</sup>) of S100a8<sup>Cre</sup>Rosa26<sup>LSL-YFP</sup>PyMT mice.

(C) Representative flow cytometric gating of tumor immune infiltrate in chimeric mice, related to Figure 3. Representative of nine independent experiments.

(D) Representative flow cytometric gating of tumor-draining lymph node migratory DC1s from chimeric mice, related to Figure 4.

(E) IRF8 protein expression as determined by flow cytometric analysis in DC1s, DC2s, monocytes, MTMs and TAMs from tumors in *Irf8*<sup>fl/fl</sup>PyMT (black) and MafB<sup>iCre</sup>*Irf8*<sup>fl/fl</sup>PyMT (gray) mice, and a fluorescence minus one (FMO) sample unstained for IRF8 in shaded gray.

(F) Representative histograms and quantification of expression of CD80, CD86 and PD-L1 in DC1s, DC2s, monocytes, MTMs and TAMs in tumors of *Irf8*<sup>fl/fl</sup>PyMT (n=5) and MafB<sup>iCre</sup>*Irf8*<sup>fl/fl</sup>PyMT (n=4) mice.

(G) Expression of PD-1 and CTV of OT-I T cells after 72 h coculture with TAMs sorted from tumors of *Irf8*<sup>fl/fl</sup>PyMT and MafB<sup>iCre</sup>*Irf8*<sup>fl/fl</sup>PyMT mice. TAMs were pulsed with the SIINFEKL peptide for 1 h and then peptide was washed away before coculture.

(H) Expression of PD-1 and CTV of OT-I T cells after 72 h coculture with TAMs or cancer cells sorted from PyMT tumors. TAMs and cancer cells were pulsed with the SIINFEKL peptide for 1 h and then peptide was washed away before coculture.

Each circle represents one mouse, data displayed as mean +/- SEM, unpaired student's t-test, ns = not significant.



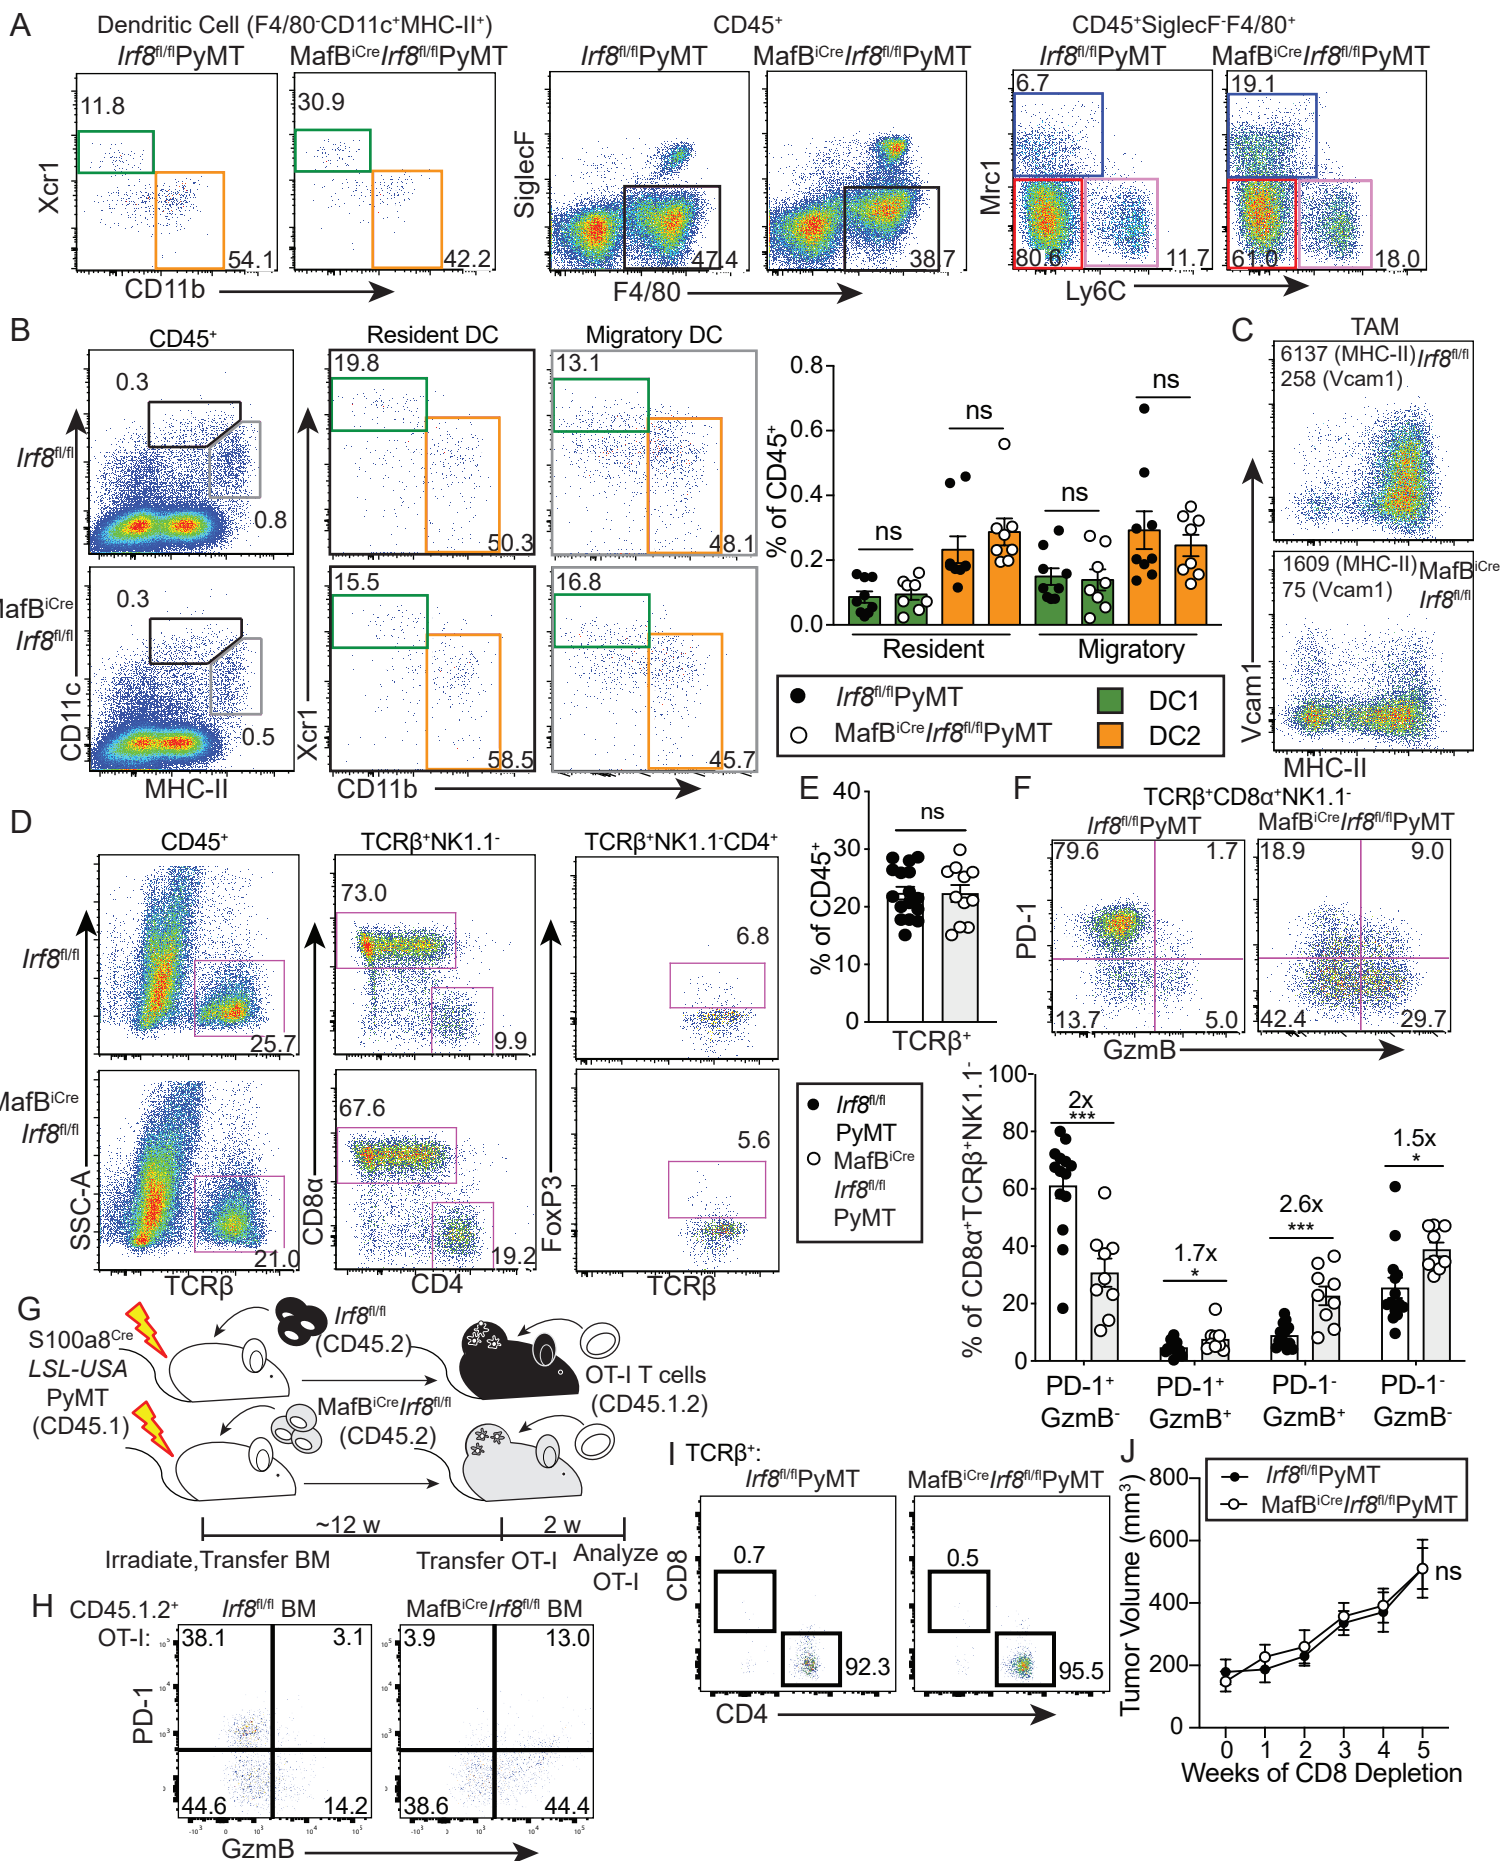

**Figure S5. MafB<sup>iCre</sup>*Irf8*<sup>fl/fl</sup>PyMT mice display TAM defects while maintaining normal DC and T cell abundances with enhanced effector CTL responses supporting cancer surveillance, related to Figure 5.**

(A) Representative flow cytometric gating of DC1s, DC2s, F4/80<sup>+</sup>SiglecF<sup>-</sup> cells, monocytes, MTMs and TAMs from *Irf8*<sup>fl/fl</sup>PyMT and MafB<sup>iCre</sup>*Irf8*<sup>fl/fl</sup>PyMT mice corresponding to quantification displayed in Figure 5A-B.

(B) Representative flow cytometric gating and quantification of resident (black) and migratory (gray) DC1s and DC2s in tumor-draining lymph nodes of *Irf8*<sup>fl/fl</sup>PyMT (black circles, n=9) and MafB<sup>iCre</sup>*Irf8*<sup>fl/fl</sup>PyMT (white circles, n=8) mice.

(C) Representative flow cytometric plot of MHC-II and Vcam1 expression in *Irf8*<sup>fl/fl</sup>PyMT and MafB<sup>iCre</sup>*Irf8*<sup>fl/fl</sup>PyMT TAMs corresponding to quantification displayed in Figure 5C, MFI indicated on representative plot.

(D) Representative flow quantification of tumor-infiltrating lymphocytes in *Irf8*<sup>fl/fl</sup>PyMT and MafB<sup>iCre</sup>*Irf8*<sup>fl/fl</sup>PyMT mice, corresponding to quantification displayed in Figure 5D.

(E) Quantification of total TCRβ<sup>+</sup> cells in tumors of *Irf8*<sup>fl/fl</sup>PyMT (black circle, n=16) and MafB<sup>iCre</sup>*Irf8*<sup>fl/fl</sup>PyMT (white circle, n=11) mice.

(F) Representative flow cytometric analysis (top) and quantification (bottom) of PD-1 and granzyme B (GzmB) expression among TCRβ<sup>+</sup>CD8α<sup>+</sup>NK1.1<sup>-</sup> cells of *Irf8*<sup>fl/fl</sup>PyMT (n=14) and MafB<sup>iCre</sup>*Irf8*<sup>fl/fl</sup>PyMT (n=9) mouse tumors.

(G) Schematic depicting experimental design for assessment of TAM function in a tumor antigen-specific model. CD45.1 S100a8<sup>Cre</sup>LSL-USAPyMT mice were irradiated and received either CD45.2 *Irf8*<sup>fl/fl</sup> or MafB<sup>iCre</sup>*Irf8*<sup>fl/fl</sup> bone marrow. Chimeric mice were aged, allowing tumors to grow, and upon moderate tumor burden, 1x10<sup>6</sup> naïve CD45.1.2 OT-I T cells were transferred and analyzed by flow cytometry two weeks later, related to Figure 5K.

(H) Representative flow cytometric analysis of PD-1 and GzmB expression in CD45.1.2 OT-I T cells two weeks after transfer in chimeric mice, related to Figure 5K.

(I) Expression of CD4 and CD8 among TCR $\beta$ <sup>+</sup> cells in blood from *Irf8*<sup>fl/fl</sup>PyMT and MafB<sup>iCre</sup>*Irf8*<sup>fl/fl</sup>PyMT mice receiving a CD8 depletion antibody.

(J) Weekly tumor measurements from *Irf8*<sup>fl/fl</sup>PyMT (n=6) and MafB<sup>iCre</sup>*Irf8*<sup>fl/fl</sup>PyMT (n=7) mice treated with a CD8 depletion antibody every 3-4 days, beginning around 14 weeks of age for 5 weeks.

Data are displayed as mean +/- SEM, fold change value of *Irf8*<sup>fl/fl</sup>PyMT versus MafB<sup>iCre</sup>*Irf8*<sup>fl/fl</sup>PyMT means are displayed above significant comparisons (E, F: unpaired student's t test, two-tailed, \* = p < 0.05, \*\*\* = p < 0.001, H: two-way ANOVA, ns = not significant).

C1 C2a C2b C3a C3b C4 C5a C5b C6

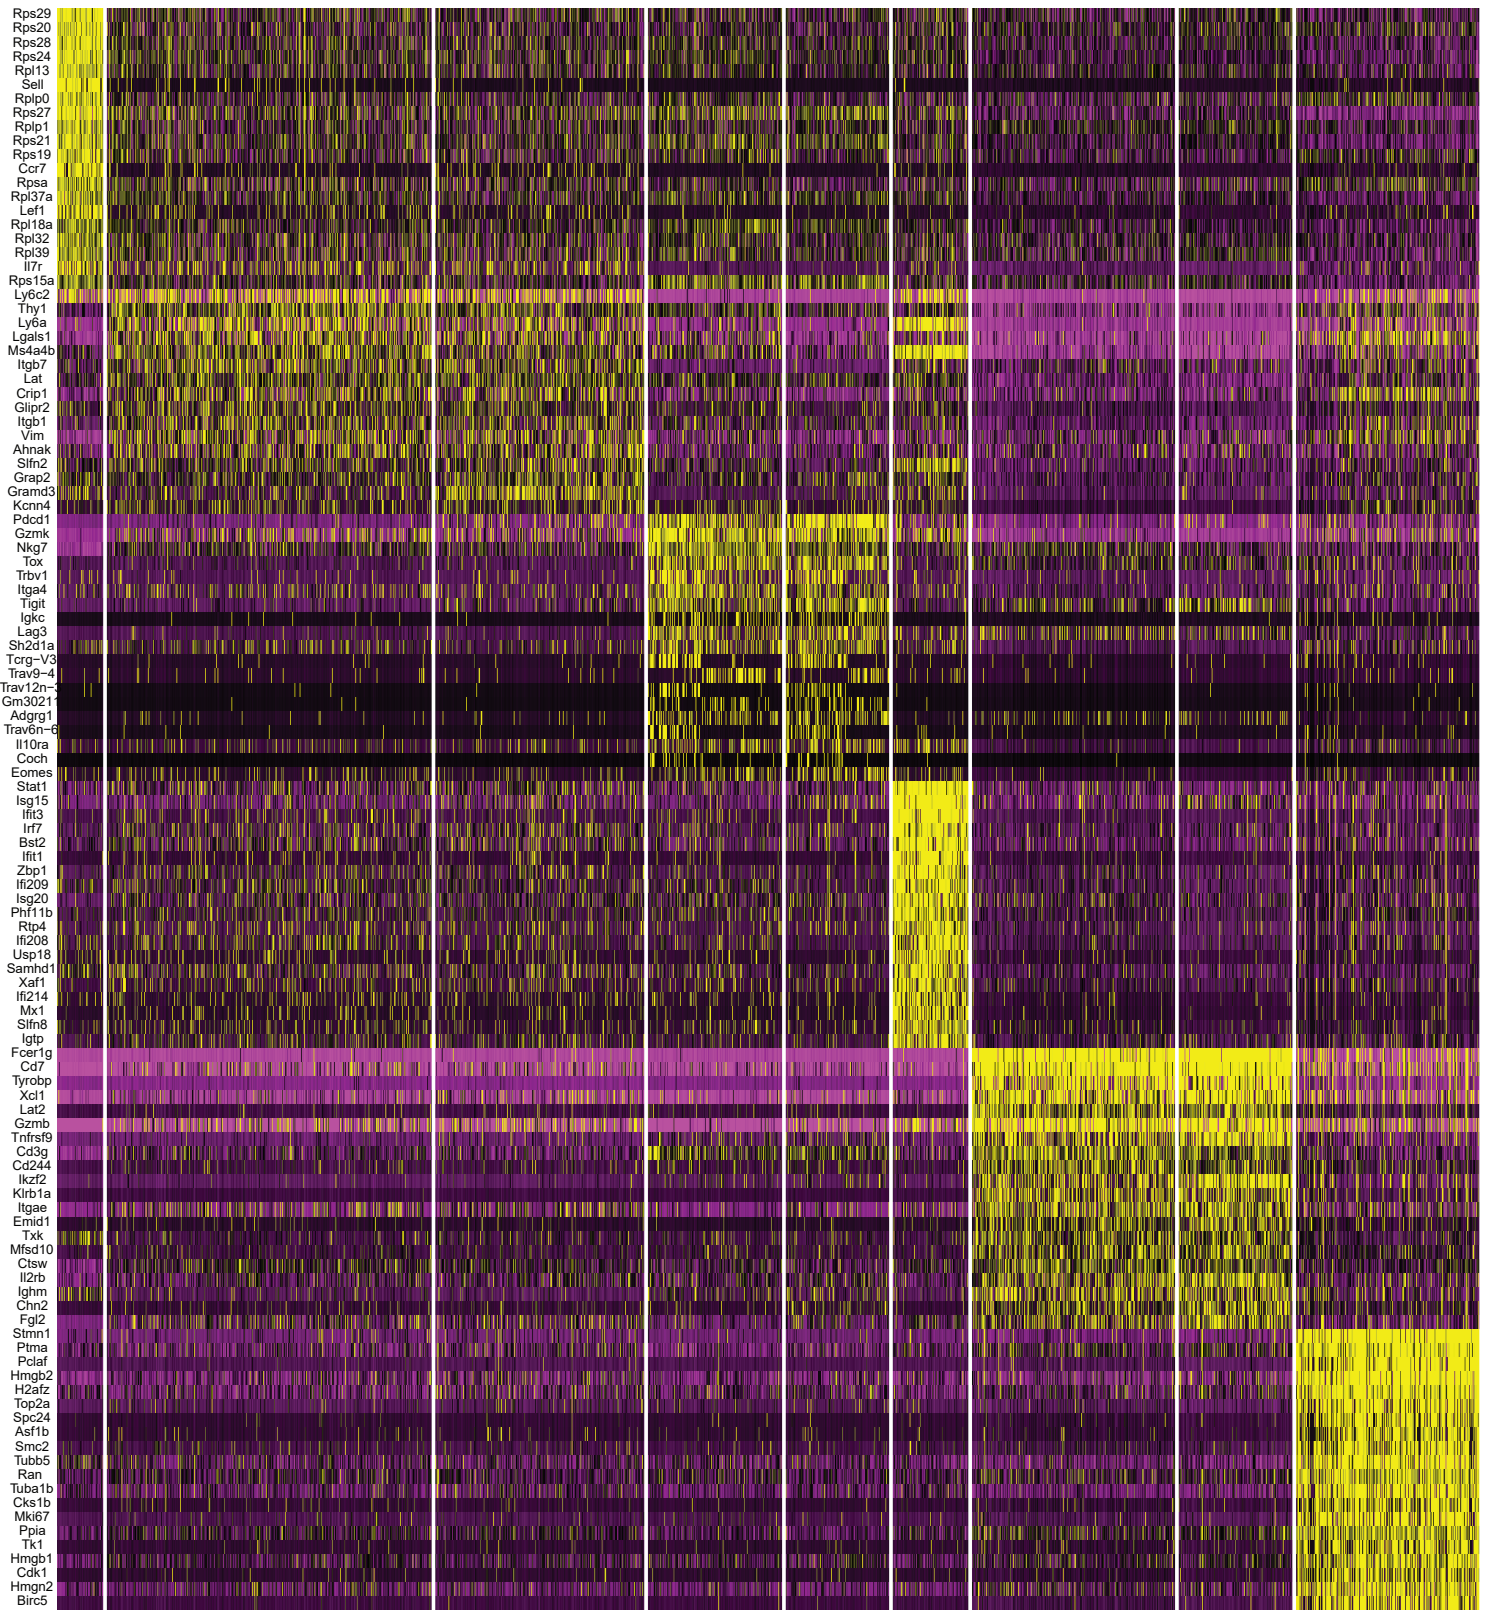

**Figure S6. Differentially expressed transcripts among scRNAseq clusters, related to Figure 5.**

Expression of genes in all cells in all 9 clusters. Top twenty differentially expressed genes (DEGs) among each cluster relative to all the others are shown. For clusters with “a” and “b”, DEGs were determined by shared DEGs among “a” cluster versus all other clusters minus “b”, and “b” cluster versus all other clusters minus “a”.

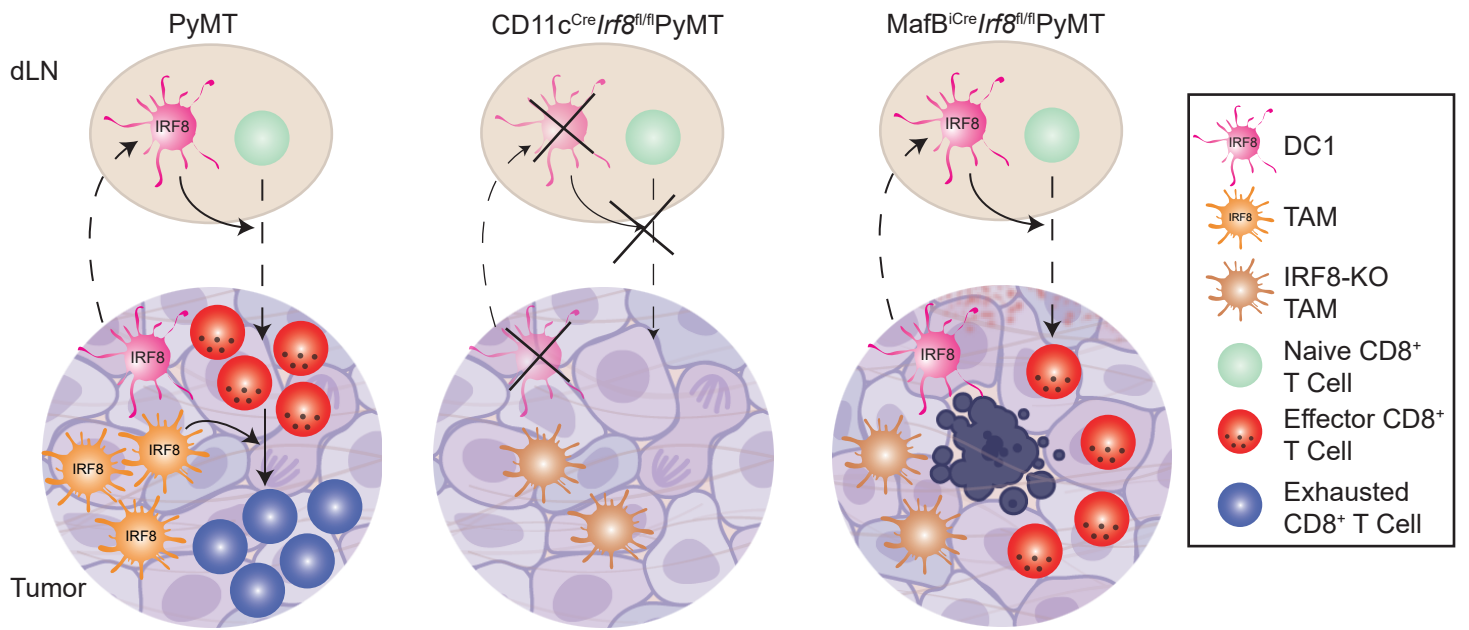

**Figure S7. IRF8 governs TAM control of T cell exhaustion, related to Figures 1 to 7.** Model summarizing findings, showing DC1, TAM and CD8<sup>+</sup> T cell fates in tumor-draining lymph nodes (dLN) and tumor of PyMT, CD11c<sup>Cre</sup>*Irf8*<sup>fl/fl</sup>PyMT and MafB<sup>iCre</sup>*Irf8*<sup>fl/fl</sup>PyMT mice.

## Supplemental Tables

**Table S1. Differentially expressed transcription factor genes among monocytes, MTMs, and TAMs, related to Figure 1.**

**Table S2. Differentially expressed genes between *Irf8<sup>fl/fl</sup>* and CD11c<sup>Cre</sup>*Irf8<sup>fl/fl</sup>* TAMs, related to Figures 3 and S3.**

**Table S3. Ingenuity Pathway Analysis for *Irf8<sup>fl/fl</sup>* versus CD11c<sup>Cre</sup>*Irf8<sup>fl/fl</sup>* TAMs, related to Figure 3.**

**Table S4. Ingenuity Pathway Analysis for TAMs versus DC1s, related to Figure 4.**

**Table S5. Differentially expressed genes between “a” and “b” clusters in scRNAseq, related to Figures 5 and S6.**



**Table S1 Differentially expressed transcription factor genes among monocytes (Mono), MTMs and TAMs, related to Figure 1**

|          |         | Mean Expression |            |             | Adj P Value (FDR) |            |             | Log2 Fold Change |            |             |
|----------|---------|-----------------|------------|-------------|-------------------|------------|-------------|------------------|------------|-------------|
| EntrezID | Gene    | Mono vs MTM     | TAM vs MTM | TAM vs Mono | Mono vs MTM       | TAM vs MTM | TAM vs Mono | Mono vs MTM      | TAM vs MTM | TAM vs Mono |
| 11622    | Ahr     | 3718            | 1199       | 2935        | 0.0000            | 0.5871     | 0.0000      | 2.12             | -0.36      | -2.47       |
| 11632    | Aip     | 5310            | 4433       | 5527        | 0.0220            | 0.4034     | 0.1413      | 0.82             | 0.34       | -0.48       |
| 100182   | Akna    | 12934           | 7846       | 10744       | 0.0017            | 0.3322     | 0.0000      | 0.90             | -0.33      | -1.23       |
| 11792    | Apex1   | 2148            | 2897       | 2438        | 0.0044            | 0.7435     | 0.0001      | -0.84            | 0.13       | 0.98        |
| 13496    | Arid3a  | 1431            | 753        | 1217        | 0.0001            | 0.7420     | 0.0000      | 1.34             | -0.16      | -1.50       |
| 56380    | Arid3b  | 784             | 1121       | 1120        | 0.9894            | 0.0792     | 0.0486      | 0.01             | 0.78       | 0.77        |
| 214855   | Arid5a  | 9332            | 4378       | 7483        | 0.0478            | 0.6512     | 0.0011      | 1.39             | -0.39      | -1.78       |
| 11863    | Arnt    | 2451            | 1888       | 2177        | 0.1130            | 0.5566     | 0.0026      | 0.47             | -0.19      | -0.66       |
| 12013    | Bach1   | 2945            | 1525       | 2227        | 0.0328            | 0.1309     | 0.0000      | 0.96             | -0.68      | -1.64       |
| 53314    | Batf    | 1912            | 1100       | 1666        | 0.0424            | 0.9167     | 0.0060      | 1.22             | -0.10      | -1.31       |
| 381319   | Batf3   | 884             | 1530       | 1439        | 0.4935            | 0.0268     | 0.0001      | -0.40            | 0.90       | 1.30        |
| 14025    | Bcl11a  | 503             | 72         | 376         | 0.0000            | 0.4044     | 0.0000      | 3.22             | -0.75      | -3.97       |
| 12053    | Bcl6    | 1978            | 1389       | 1801        | 0.0374            | 0.9464     | 0.0065      | 0.83             | -0.04      | -0.87       |
| 17341    | Bhlha15 | 185             | 226        | 333         | 0.0059            | 0.0023     | 0.9779      | 2.97             | 3.03       | 0.06        |
| 20893    | Bhlhe40 | 19133           | 9958       | 10440       | 0.9181            | 0.0006     | 0.0001      | 0.12             | -1.91      | -2.03       |
| 79362    | Bhlhe41 | 633             | 994        | 751         | 0.0984            | 0.9452     | 0.0247      | -1.61            | 0.10       | 1.72        |
| 237911   | Brip1   | 291             | 269        | 116         | 0.0000            | 0.0000     | 0.1029      | -2.50            | -1.86      | 0.64        |
| 74007    | Btbd11  | 97              | 307        | 284         | 0.5506            | 0.1525     | 0.0054      | -0.95            | 1.71       | 2.66        |
| 228662   | Btbd3   | 175             | 252        | 226         | 0.2486            | 0.3637     | 0.0036      | -0.58            | 0.42       | 1.00        |
| 12227    | Btg2    | 52254           | 32927      | 45386       | 0.0592            | 0.8150     | 0.0048      | 0.96             | -0.16      | -1.12       |
| 12606    | Cebpa   | 3900            | 7465       | 6061        | 0.0002            | 0.2035     | 0.0000      | -1.50            | 0.58       | 2.08        |
| 12608    | Cebpb   | 76206           | 25581      | 50393       | 0.0039            | 0.0004     | 0.0000      | 1.35             | -1.49      | -2.85       |
| 12609    | Cebpd   | 6519            | 4456       | 7290        | 0.0000            | 0.0168     | 0.0244      | 1.92             | 1.03       | -0.88       |
| 110794   | Cebpe   | 162             | 63         | 70          | 0.9239            | 0.0000     | 0.0000      | 0.18             | -3.97      | -4.15       |
| 106143   | Cggbp1  | 5306            | 4171       | 4783        | 0.1382            | 0.6681     | 0.0079      | 0.46             | -0.15      | -0.61       |
| 232791   | Cnot3   | 1796            | 1294       | 1555        | 0.2170            | 0.6220     | 0.0138      | 0.58             | -0.24      | -0.82       |
| 12913    | Creb3   | 3238            | 3623       | 4094        | 0.0607            | 0.0057     | 0.6490      | 0.57             | 0.72       | 0.15        |
| 231991   | Creb5   | 843             | 1109       | 644         | 0.0074            | 0.5888     | 0.0219      | -2.70            | -0.69      | 2.01        |
| 12914    | Crebbp  | 1447            | 1039       | 1252        | 0.1782            | 0.6022     | 0.0085      | 0.59             | -0.24      | -0.83       |
| 13047    | Cux1    | 7069            | 4373       | 4412        | 0.9464            | 0.0000     | 0.0000      | 0.03             | -1.31      | -1.34       |
| 13134    | Dach1   | 142             | 234        | 149         | 0.0722            | 0.9452     | 0.0365      | -3.14            | -0.19      | 2.95        |
| 13170    | Dbp     | 57              | 148        | 135         | 0.0867            | 0.0011     | 0.0000      | -0.93            | 1.38       | 2.31        |
| 13198    | Ddit3   | 674             | 1096       | 960         | 0.1644            | 0.3041     | 0.0008      | -0.79            | 0.56       | 1.35        |
| 102442   | Dennd4a | 2998            | 1506       | 1953        | 0.5365            | 0.0650     | 0.0010      | 0.60             | -1.29      | -1.89       |
| 13555    | E2f1    | 1928            | 2440       | 1743        | 0.0033            | 0.5859     | 0.0104      | -1.51            | -0.36      | 1.15        |
| 242705   | E2f2    | 3918            | 1575       | 3169        | 0.0000            | 0.5500     | 0.0000      | 1.76             | -0.29      | -2.05       |
| 13559    | E2f5    | 373             | 458        | 342         | 0.0122            | 0.6076     | 0.0319      | -1.27            | -0.32      | 0.95        |
| 52679    | E2f7    | 172             | 158        | 38          | 0.0000            | 0.0082     | 0.0208      | -4.82            | -2.61      | 2.21        |
| 108961   | E2f8    | 545             | 521        | 245         | 0.0000            | 0.0001     | 0.1162      | -2.35            | -1.65      | 0.70        |
| 13560    | E4f1    | 1538            | 1090       | 1282        | 0.2835            | 0.3827     | 0.0056      | 0.49             | -0.37      | -0.86       |
| 13654    | Egr2    | 5577            | 4551       | 2352        | 0.0063            | 0.0003     | 0.7218      | -1.67            | -1.94      | -0.27       |
| 13655    | Egr3    | 202             | 278        | 176         | 0.0269            | 0.7426     | 0.0360      | -2.33            | -0.45      | 1.88        |
| 13661    | Ehf     | 647             | 1027       | 1228        | 0.1967            | 0.0155     | 0.4717      | 1.29             | 1.93       | 0.65        |
| 69257    | Elf2    | 1137            | 1460       | 1611        | 0.3602            | 0.0298     | 0.3638      | 0.53             | 0.94       | 0.42        |
| 56501    | Elf4    | 5831            | 3641       | 4804        | 0.0540            | 0.4078     | 0.0002      | 0.80             | -0.37      | -1.17       |
| 13711    | Elf5    | 74              | 204        | 221         | 0.4735            | 0.0029     | 0.0496      | 0.92             | 2.56       | 1.64        |
| 13713    | Elk3    | 2616            | 1785       | 1973        | 0.6179            | 0.0887     | 0.0033      | 0.29             | -0.70      | -0.98       |
| 13714    | Elk4    | 864             | 542        | 655         | 0.1171            | 0.0177     | 0.0000      | 0.52             | -0.67      | -1.19       |
| 13982    | Esr1    | 379             | 212        | 295         | 0.2994            | 0.5094     | 0.0144      | 0.89             | -0.55      | -1.44       |
| 26379    | Esrra   | 1316            | 1758       | 1734        | 0.8986            | 0.0206     | 0.0034      | -0.06            | 0.60       | 0.66        |
| 104156   | Etv5    | 2687            | 4336       | 3170        | 0.0050            | 0.9505     | 0.0004      | -1.89            | 0.07       | 1.96        |
| 14011    | Etv6    | 6339            | 4050       | 5412        | 0.0013            | 0.4729     | 0.0000      | 0.86             | -0.24      | -1.10       |
| 14030    | Ewsr1   | 18438           | 13004      | 13262       | 0.8715            | 0.0000     | 0.0000      | 0.07             | -0.84      | -0.90       |
| 14281    | Fos     | 143211          | 96088      | 108581      | 0.5853            | 0.1464     | 0.0064      | 0.34             | -0.68      | -1.02       |
| 14283    | Fosl1   | 181             | 28         | 124         | 0.1705            | 0.2806     | 0.0007      | 2.58             | -1.96      | -4.54       |
| 14284    | Fosl2   | 5720            | 2234       | 3520        | 0.3295            | 0.0116     | 0.0000      | 0.91             | -1.75      | -2.66       |
| 17425    | Foxk1   | 705             | 354        | 562         | 0.0074            | 0.4160     | 0.0000      | 1.22             | -0.44      | -1.66       |
| 14235    | Foxm1   | 685             | 658        | 208         | 0.0000            | 0.0003     | 0.0026      | -3.89            | -2.17      | 1.73        |
| 14236    | Foxn2   | 2099            | 983        | 1561        | 0.0057            | 0.0692     | 0.0000      | 1.12             | -0.75      | -1.87       |
| 71375    | Foxn3   | 3790            | 2195       | 3333        | 0.0000            | 0.9042     | 0.0000      | 1.24             | -0.06      | -1.30       |
| 56458    | Foxo1   | 2266            | 1275       | 1781        | 0.0163            | 0.1809     | 0.0000      | 0.90             | -0.53      | -1.43       |
| 108655   | Foxp1   | 3071            | 1188       | 2001        | 0.0139            | 0.0001     | 0.0000      | 1.08             | -1.46      | -2.54       |
| 51886    | Fubp1   | 2736            | 3276       | 2663        | 0.0033            | 0.6691     | 0.0062      | -0.88            | -0.17      | 0.71        |

|        |         |       |       |       |        |        |        |       |       |       |
|--------|---------|-------|-------|-------|--------|--------|--------|-------|-------|-------|
| 14582  | Gfi1b   | 148   | 96    | 19    | 0.1385 | 0.0000 | 0.0026 | -2.48 | -6.36 | -3.88 |
| 74533  | Gzf1    | 934   | 648   | 860   | 0.0008 | 0.9831 | 0.0001 | 0.91  | 0.01  | -0.90 |
| 73389  | Hbp1    | 4657  | 3746  | 4691  | 0.0000 | 0.2954 | 0.0009 | 0.81  | 0.24  | -0.57 |
| 15161  | Hcfc1   | 3698  | 2473  | 2962  | 0.2275 | 0.2050 | 0.0006 | 0.53  | -0.49 | -1.02 |
| 15184  | Hdac5   | 6237  | 3754  | 5380  | 0.0064 | 0.7612 | 0.0001 | 1.06  | -0.16 | -1.22 |
| 15205  | Hes1    | 2423  | 2196  | 3069  | 0.0412 | 0.1120 | 0.6653 | 1.52  | 1.16  | -0.36 |
| 55927  | Hes6    | 1701  | 1927  | 2156  | 0.1147 | 0.0111 | 0.5875 | 0.53  | 0.71  | 0.18  |
| 15248  | Hic1    | 480   | 786   | 638   | 0.1689 | 0.7426 | 0.0173 | -1.25 | 0.35  | 1.60  |
| 15251  | Hif1a   | 10515 | 5659  | 7520  | 0.1164 | 0.0184 | 0.0000 | 0.71  | -0.90 | -1.61 |
| 110521 | Hivep1  | 599   | 368   | 418   | 0.6181 | 0.0383 | 0.0008 | 0.34  | -0.96 | -1.30 |
| 15273  | Hivep2  | 945   | 1080  | 775   | 0.0141 | 0.3736 | 0.1136 | -1.31 | -0.54 | 0.77  |
| 15361  | Hmga1   | 1669  | 1090  | 1117  | 0.9464 | 0.0820 | 0.0311 | 0.08  | -1.07 | -1.15 |
| 15384  | Hnrnpab | 14412 | 13681 | 10960 | 0.0215 | 0.0226 | 0.9121 | -0.73 | -0.68 | 0.05  |
| 15460  | Hr      | 427   | 368   | 115   | 0.0032 | 0.0125 | 0.6579 | -3.07 | -2.51 | 0.56  |
| 15903  | Id3     | 4454  | 1365  | 3343  | 0.0000 | 0.1494 | 0.0000 | 1.98  | -0.70 | -2.68 |
| 22778  | Ikzf1   | 4372  | 2687  | 3864  | 0.0001 | 0.8681 | 0.0000 | 1.09  | -0.08 | -1.17 |
| 67143  | Ikzf5   | 596   | 401   | 483   | 0.2703 | 0.3169 | 0.0029 | 0.55  | -0.46 | -1.00 |
| 16362  | Irf1    | 10070 | 7515  | 10030 | 0.0173 | 0.5929 | 0.0484 | 1.01  | 0.28  | -0.73 |
| 16363  | Irf2    | 4356  | 2495  | 3669  | 0.0000 | 0.3257 | 0.0000 | 1.09  | -0.24 | -1.34 |
| 54131  | Irf3    | 2107  | 2696  | 2656  | 0.9053 | 0.1242 | 0.0412 | -0.07 | 0.51  | 0.58  |
| 16364  | Irf4    | 464   | 211   | 157   | 0.8520 | 0.0000 | 0.0000 | -0.44 | -5.08 | -4.64 |
| 15900  | Irf8    | 22282 | 32911 | 32229 | 0.8428 | 0.0209 | 0.0022 | -0.11 | 0.77  | 0.88  |
| 16391  | Irf9    | 6664  | 6352  | 7671  | 0.0015 | 0.0179 | 0.4607 | 0.79  | 0.58  | -0.20 |
| 16468  | Jarid2  | 6613  | 1891  | 4446  | 0.0000 | 0.0000 | 0.0000 | 1.65  | -1.52 | -3.18 |
| 16549  | Khsrp   | 4188  | 3564  | 3257  | 0.4792 | 0.0232 | 0.2079 | -0.27 | -0.62 | -0.35 |
| 21847  | Klf10   | 8095  | 3812  | 5821  | 0.0295 | 0.0393 | 0.0000 | 1.01  | -0.90 | -1.90 |
| 194655 | Klf11   | 958   | 573   | 713   | 0.4264 | 0.2192 | 0.0044 | 0.58  | -0.74 | -1.32 |
| 50794  | Klf13   | 12302 | 5227  | 9324  | 0.0000 | 0.0268 | 0.0000 | 1.39  | -0.66 | -2.05 |
| 16598  | Klf2    | 29156 | 12052 | 22012 | 0.1089 | 0.4736 | 0.0013 | 1.42  | -0.68 | -2.10 |
| 16599  | Klf3    | 7696  | 3463  | 6561  | 0.0000 | 0.9545 | 0.0000 | 1.74  | -0.05 | -1.79 |
| 16600  | Klf4    | 3542  | 1649  | 2049  | 0.6618 | 0.0046 | 0.0001 | 0.45  | -1.82 | -2.27 |
| 16601  | Klf9    | 534   | 234   | 400   | 0.0596 | 0.3209 | 0.0001 | 1.29  | -0.72 | -2.01 |
| 16978  | Lrrfip1 | 12483 | 7414  | 9172  | 0.2588 | 0.0494 | 0.0000 | 0.56  | -0.79 | -1.35 |
| 16658  | Mafb    | 34968 | 34503 | 28372 | 0.3098 | 0.3805 | 0.8478 | -0.67 | -0.53 | 0.14  |
| 17135  | Mafk    | 6468  | 3656  | 4731  | 0.3896 | 0.2108 | 0.0030 | 0.67  | -0.80 | -1.47 |
| 17187  | Max     | 1435  | 2472  | 2584  | 0.6924 | 0.0067 | 0.0265 | 0.31  | 1.33  | 1.02  |
| 17188  | Maz     | 2607  | 2813  | 2142  | 0.0184 | 0.2690 | 0.2227 | -1.03 | -0.52 | 0.50  |
| 19014  | Med1    | 2235  | 1640  | 1792  | 0.5602 | 0.1468 | 0.0054 | 0.27  | -0.51 | -0.78 |
| 17268  | Meis1   | 150   | 70    | 128   | 0.0085 | 0.9805 | 0.0012 | 1.66  | -0.03 | -1.69 |
| 17537  | Meis3   | 522   | 2347  | 2041  | 0.0000 | 0.0000 | 0.0000 | -3.01 | 1.81  | 4.81  |
| 17342  | Mitf    | 353   | 492   | 393   | 0.0328 | 0.9542 | 0.0058 | -1.13 | 0.05  | 1.18  |
| 21428  | Mlx     | 2597  | 2200  | 2640  | 0.0044 | 0.4194 | 0.0355 | 0.67  | 0.23  | -0.44 |
| 208104 | Mlxip   | 2665  | 2053  | 2439  | 0.1107 | 0.8659 | 0.0175 | 0.58  | -0.08 | -0.66 |
| 17764  | Mtf1    | 1114  | 889   | 974   | 0.3291 | 0.3584 | 0.0069 | 0.31  | -0.26 | -0.57 |
| 17119  | Mxd1    | 16563 | 5041  | 9617  | 0.0291 | 0.0000 | 0.0000 | 1.13  | -2.52 | -3.66 |
| 17121  | Mxd3    | 142   | 172   | 83    | 0.0008 | 0.3596 | 0.0112 | -3.47 | -1.11 | 2.35  |
| 17122  | Mxd4    | 466   | 763   | 770   | 0.9190 | 0.0019 | 0.0015 | 0.07  | 1.08  | 1.01  |
| 17859  | Mxi1    | 5157  | 3009  | 3493  | 0.6365 | 0.0439 | 0.0012 | 0.37  | -1.08 | -1.45 |
| 17865  | Mybl2   | 381   | 391   | 150   | 0.0000 | 0.0222 | 0.0095 | -3.54 | -1.76 | 1.79  |
| 17869  | Myc     | 2575  | 3117  | 2104  | 0.0000 | 0.1412 | 0.0001 | -1.67 | -0.55 | 1.11  |
| 16918  | Mycl    | 158   | 540   | 478   | 0.0473 | 0.0301 | 0.0000 | -1.63 | 1.62  | 3.25  |
| 67991  | Nacc2   | 801   | 1167  | 955   | 0.0116 | 0.7367 | 0.0002 | -1.05 | 0.19  | 1.24  |
| 18019  | Nfatc2  | 1361  | 1623  | 1315  | 0.0066 | 0.6664 | 0.0125 | -0.89 | -0.18 | 0.71  |
| 18022  | Nfe2    | 3278  | 108   | 2390  | 0.0000 | 0.0001 | 0.0000 | 4.75  | -2.85 | -7.60 |
| 18030  | Nfil3   | 12428 | 3971  | 8091  | 0.1822 | 0.0625 | 0.0000 | 1.38  | -1.64 | -3.03 |
| 18033  | Nfkb1   | 5306  | 2003  | 4126  | 0.0000 | 0.1762 | 0.0000 | 1.72  | -0.51 | -2.23 |
| 18034  | Nfkb2   | 11086 | 5225  | 8140  | 0.0785 | 0.1739 | 0.0000 | 1.07  | -0.81 | -1.88 |
| 100978 | Nfxl1   | 1242  | 2107  | 1917  | 0.2863 | 0.1056 | 0.0002 | -0.59 | 0.75  | 1.34  |
| 18046  | Nfyc    | 1481  | 1167  | 1329  | 0.1171 | 0.5806 | 0.0033 | 0.43  | -0.17 | -0.60 |
| 22259  | Nr1h3   | 1616  | 905   | 1084  | 0.6795 | 0.1338 | 0.0108 | 0.44  | -1.13 | -1.56 |
| 22026  | Nr2c2   | 883   | 546   | 769   | 0.0126 | 0.8108 | 0.0004 | 1.03  | -0.14 | -1.17 |
| 15370  | Nr4a1   | 68431 | 27561 | 52415 | 0.0278 | 0.4582 | 0.0001 | 1.54  | -0.59 | -2.13 |
| 18227  | Nr4a2   | 2259  | 1093  | 1327  | 0.7947 | 0.1049 | 0.0153 | 0.42  | -1.72 | -2.14 |
| 211323 | Nrg1    | 611   | 30    | 447   | 0.0000 | 0.0781 | 0.0000 | 4.42  | -1.88 | -6.31 |
| 11545  | Parp1   | 6795  | 6616  | 4924  | 0.0000 | 0.0002 | 0.4446 | -0.99 | -0.79 | 0.20  |
| 18514  | Pbx1    | 494   | 74    | 392   | 0.0000 | 0.8843 | 0.0000 | 3.74  | 0.17  | -3.56 |
| 71041  | Pcgf6   | 214   | 303   | 262   | 0.1731 | 0.6214 | 0.0093 | -0.74 | 0.29  | 1.03  |

|        |         |        |       |       |        |        |        |       |       |       |
|--------|---------|--------|-------|-------|--------|--------|--------|-------|-------|-------|
| 18673  | Phb     | 1346   | 1765  | 1623  | 0.3418 | 0.3749 | 0.0087 | -0.40 | 0.34  | 0.74  |
| 72057  | Phf10   | 1717   | 1200  | 1387  | 0.2828 | 0.1659 | 0.0006 | 0.43  | -0.48 | -0.91 |
| 54711  | Plagl2  | 1673   | 1064  | 1318  | 0.3270 | 0.3140 | 0.0048 | 0.60  | -0.55 | -1.15 |
| 22038  | Plscr1  | 2267   | 1568  | 1252  | 0.3298 | 0.0000 | 0.0041 | -0.53 | -1.56 | -1.03 |
| 18987  | Pou2f2  | 1579   | 1174  | 1694  | 0.0253 | 0.3548 | 0.1904 | 1.37  | 0.63  | -0.75 |
| 110593 | Prdm2   | 1343   | 930   | 1165  | 0.1917 | 0.7206 | 0.0189 | 0.70  | -0.22 | -0.92 |
| 50907  | Preb    | 5541   | 4550  | 5409  | 0.0045 | 0.7332 | 0.0057 | 0.62  | 0.10  | -0.51 |
| 19401  | Rara    | 6451   | 1227  | 4239  | 0.0000 | 0.0000 | 0.0000 | 2.11  | -2.25 | -4.36 |
| 19411  | Rarg    | 1636   | 534   | 1179  | 0.0016 | 0.0917 | 0.0000 | 1.70  | -0.96 | -2.66 |
| 19664  | Rbpj    | 2661   | 2370  | 1877  | 0.0836 | 0.0168 | 0.7681 | -0.72 | -0.86 | -0.14 |
| 19696  | Rel     | 3643   | 1951  | 2481  | 0.5701 | 0.1637 | 0.0072 | 0.59  | -1.09 | -1.67 |
| 19697  | Rela    | 13983  | 8797  | 12152 | 0.0966 | 0.8398 | 0.0121 | 0.97  | -0.16 | -1.13 |
| 19712  | Rest    | 3506   | 2201  | 2713  | 0.2720 | 0.1897 | 0.0008 | 0.58  | -0.61 | -1.19 |
| 19725  | Rfx2    | 497    | 71    | 319   | 0.0010 | 0.0000 | 0.0000 | 2.32  | -3.51 | -5.83 |
| 19726  | Rfx3    | 143    | 67    | 114   | 0.0162 | 0.5397 | 0.0001 | 1.37  | -0.43 | -1.80 |
| 67150  | Rnf141  | 390    | 306   | 256   | 0.3469 | 0.0052 | 0.1425 | -0.49 | -1.06 | -0.57 |
| 19885  | Rorc    | 79     | 147   | 175   | 0.3069 | 0.0347 | 0.4618 | 1.45  | 2.33  | 0.89  |
| 12394  | Runx1   | 6076   | 3864  | 4642  | 0.2703 | 0.0927 | 0.0001 | 0.51  | -0.65 | -1.16 |
| 12393  | Runx2   | 775    | 374   | 495   | 0.3856 | 0.0066 | 0.0000 | 0.62  | -1.40 | -2.02 |
| 66118  | Sarnp   | 1783   | 1246  | 1473  | 0.2427 | 0.3076 | 0.0020 | 0.50  | -0.40 | -0.90 |
| 20230  | Satb1   | 110    | 36    | 88    | 0.0124 | 0.8422 | 0.0006 | 2.16  | -0.26 | -2.41 |
| 17127  | Smad3   | 1467   | 1085  | 1439  | 0.0123 | 0.6555 | 0.0248 | 0.98  | 0.22  | -0.75 |
| 17128  | Smad4   | 4589   | 3182  | 3862  | 0.0365 | 0.2682 | 0.0000 | 0.59  | -0.33 | -0.92 |
| 20665  | Sox10   | 433    | 908   | 1080  | 0.1615 | 0.0048 | 0.3372 | 1.71  | 2.74  | 1.03  |
| 109032 | Sp110   | 2682   | 1658  | 2251  | 0.0000 | 0.2612 | 0.0000 | 0.88  | -0.29 | -1.17 |
| 78912  | Sp2     | 2401   | 1543  | 1839  | 0.1993 | 0.0418 | 0.0000 | 0.49  | -0.64 | -1.13 |
| 20687  | Sp3     | 3293   | 2383  | 2852  | 0.3351 | 0.6798 | 0.0468 | 0.56  | -0.25 | -0.81 |
| 30051  | Spdef   | 56     | 123   | 133   | 0.6395 | 0.0474 | 0.1785 | 0.71  | 2.04  | 1.33  |
| 20375  | Spi1    | 34580  | 29061 | 34728 | 0.0359 | 0.6081 | 0.0889 | 0.65  | 0.19  | -0.46 |
| 20728  | Spic    | 219    | 304   | 397   | 0.0113 | 0.0007 | 0.7002 | 1.86  | 2.20  | 0.34  |
| 20788  | Srebf2  | 7242   | 4204  | 5269  | 0.2875 | 0.0671 | 0.0001 | 0.59  | -0.82 | -1.41 |
| 20843  | Stag2   | 1993   | 1469  | 1960  | 0.0113 | 0.6417 | 0.0247 | 0.99  | 0.23  | -0.76 |
| 20847  | Stat2   | 6565   | 4132  | 5575  | 0.0291 | 0.6037 | 0.0003 | 0.88  | -0.25 | -1.13 |
| 20848  | Stat3   | 27528  | 13577 | 21046 | 0.0003 | 0.0526 | 0.0000 | 1.11  | -0.63 | -1.73 |
| 20849  | Stat4   | 430    | 202   | 248   | 0.6937 | 0.0102 | 0.0002 | 0.44  | -1.82 | -2.25 |
| 20850  | Stat5a  | 2513   | 1500  | 2086  | 0.0896 | 0.6209 | 0.0026 | 0.94  | -0.32 | -1.25 |
| 20851  | Stat5b  | 6105   | 3093  | 5117  | 0.0000 | 0.5122 | 0.0000 | 1.38  | -0.20 | -1.59 |
| 20852  | Stat6   | 19498  | 14097 | 18237 | 0.0114 | 0.9386 | 0.0039 | 0.85  | 0.04  | -0.81 |
| 20872  | Stk16   | 1394   | 1089  | 1407  | 0.0005 | 0.3653 | 0.0074 | 0.92  | 0.29  | -0.63 |
| 20024  | Sub1    | 10525  | 6461  | 9320  | 0.0076 | 0.9219 | 0.0006 | 1.10  | -0.07 | -1.16 |
| 237336 | Tbp1    | 2107   | 1945  | 2262  | 0.0032 | 0.1074 | 0.2079 | 0.59  | 0.34  | -0.25 |
| 21781  | Tfdp1   | 3032   | 3064  | 2337  | 0.0000 | 0.0007 | 0.1578 | -0.95 | -0.65 | 0.29  |
| 21426  | Tfec    | 443    | 282   | 424   | 0.0370 | 0.7664 | 0.0452 | 1.32  | 0.25  | -1.07 |
| 59016  | Thap11  | 2012   | 1640  | 2135  | 0.0055 | 0.2606 | 0.1037 | 0.98  | 0.45  | -0.54 |
| 21833  | Thra    | 154    | 124   | 163   | 0.0306 | 0.4030 | 0.1823 | 1.03  | 0.45  | -0.58 |
| 21807  | Tsc22d1 | 2034   | 1011  | 1829  | 0.0579 | 0.8870 | 0.0399 | 1.75  | 0.19  | -1.56 |
| 68842  | Tulp4   | 473    | 680   | 582   | 0.1453 | 0.6395 | 0.0074 | -0.81 | 0.29  | 1.10  |
| 22278  | Usf1    | 3170   | 2810  | 3711  | 0.0002 | 0.0130 | 0.2502 | 1.15  | 0.78  | -0.37 |
| 22344  | Vezf1   | 1299   | 1021  | 1292  | 0.0011 | 0.5034 | 0.0060 | 0.83  | 0.22  | -0.62 |
| 22433  | Xbp1    | 24367  | 21017 | 28799 | 0.0000 | 0.0008 | 0.1045 | 1.32  | 0.88  | -0.44 |
| 56449  | Ybx3    | 8247   | 5682  | 5151  | 0.6737 | 0.0003 | 0.0018 | -0.24 | -1.25 | -1.00 |
| 58206  | Zbtb32  | 607    | 169   | 347   | 0.4531 | 0.0101 | 0.0000 | 1.21  | -2.90 | -4.11 |
| 75580  | Zbtb4   | 159    | 313   | 259   | 0.0176 | 0.2758 | 0.0000 | -1.37 | 0.67  | 2.04  |
| 382639 | Zbtb42  | 498    | 309   | 359   | 0.5696 | 0.1097 | 0.0034 | 0.40  | -0.84 | -1.24 |
| 16969  | Zbtb7a  | 5638   | 4535  | 5402  | 0.0037 | 0.8790 | 0.0016 | 0.61  | 0.05  | -0.56 |
| 24136  | Zeb2    | 7645   | 5113  | 6252  | 0.2078 | 0.3455 | 0.0019 | 0.59  | -0.42 | -1.01 |
| 21769  | Zfand3  | 648    | 716   | 772   | 0.2206 | 0.0258 | 0.5358 | 0.35  | 0.51  | 0.16  |
| 11906  | Zfhx3   | 851    | 1509  | 1169  | 0.0006 | 0.5968 | 0.0000 | -1.70 | 0.35  | 2.05  |
| 22640  | Zfp1    | 227    | 292   | 268   | 0.3299 | 0.4477 | 0.0129 | -0.41 | 0.29  | 0.70  |
| 63872  | Zfp296  | 184    | 75    | 151   | 0.0892 | 0.8879 | 0.0144 | 1.77  | -0.21 | -1.98 |
| 22695  | Zfp36   | 138207 | 77852 | 88657 | 0.6789 | 0.0076 | 0.0001 | 0.31  | -1.27 | -1.59 |
| 22751  | Zfp90   | 457    | 894   | 782   | 0.0386 | 0.0601 | 0.0000 | -0.98 | 0.84  | 1.81  |
| 626848 | Zfp971  | 554    | 86    | 402   | 0.0000 | 0.0229 | 0.0000 | 2.89  | -1.18 | -4.07 |
| 22761  | Zfpm1   | 355    | 490   | 382   | 0.0105 | 0.9862 | 0.0023 | -1.22 | -0.02 | 1.20  |
| 22697  | Zscan21 | 718    | 907   | 867   | 0.6720 | 0.2937 | 0.0433 | -0.20 | 0.38  | 0.58  |

Table S2 Differentially expressed genes between *Irf8<sup>fl/fl</sup>* and CD11c<sup>Cre</sup>*Irf8<sup>fl/fl</sup>* TAMs, related to Figures 3 and S3

| Entrez ID | Gene          | Base Mean | Log2 Fold Change | Padj (FDR) | Passed FPKM? | Group      |
|-----------|---------------|-----------|------------------|------------|--------------|------------|
| 12945     | Dmbt1         | 170.28    | 10.84            | 2.17E-09   | NO           | IRF8_WT_Up |
| 100504594 | A630012P03Rik | 56.74     | 7.78             | 1.18E-04   | NO           | IRF8_WT_Up |
| 102634431 | Gm32014       | 54.50     | 6.85             | 6.25E-05   | NO           | IRF8_WT_Up |
| 13214     | Defb1         | 81.51     | 5.22             | 2.86E-03   | YES          | IRF8_WT_Up |
| 320840    | Negr1         | 183.13    | 5.13             | 9.60E-10   | NO           | IRF8_WT_Up |
| 11607     | Agtr1a        | 237.17    | 4.98             | 2.62E-11   | YES          | IRF8_WT_Up |
| 14397     | Gabra4        | 83.28     | 4.95             | 9.41E-05   | NO           | IRF8_WT_Up |
| 20309     | Cxcl15        | 114.52    | 4.89             | 4.39E-08   | NO           | IRF8_WT_Up |
| 76507     | Aoc1          | 88.59     | 4.72             | 3.94E-04   | NO           | IRF8_WT_Up |
| 11670     | Aldh3a1       | 68.27     | 4.61             | 9.45E-03   | NO           | IRF8_WT_Up |
| 114479    | Slc5a5        | 213.72    | 4.59             | 1.46E-13   | NO           | IRF8_WT_Up |
| 13179     | Dcn           | 756.63    | 4.56             | 4.64E-29   | YES          | IRF8_WT_Up |
| 69627     | Fam89a        | 54.20     | 4.49             | 1.16E-02   | NO           | IRF8_WT_Up |
| 94180     | Acsbg1        | 106.05    | 4.43             | 7.20E-03   | NO           | IRF8_WT_Up |
| 18667     | Pgr           | 141.20    | 4.35             | 4.39E-08   | NO           | IRF8_WT_Up |
| 278304    | Zfp385c       | 130.13    | 4.26             | 8.30E-07   | NO           | IRF8_WT_Up |
| 16682     | Krt4          | 149.23    | 4.23             | 7.90E-08   | NO           | IRF8_WT_Up |
| 13086     | Cyp2a4        | 55.57     | 4.22             | 3.72E-04   | NO           | IRF8_WT_Up |
| 228852    | Ppp1r16b      | 122.28    | 4.21             | 2.31E-06   | NO           | IRF8_WT_Up |
| 232414    | Clec9a        | 506.32    | 4.20             | 6.90E-22   | YES          | IRF8_WT_Up |
| 73713     | Rbm20         | 87.26     | 4.19             | 4.40E-06   | NO           | IRF8_WT_Up |
| 12292     | Cacna1s       | 85.54     | 3.91             | 2.18E-04   | NO           | IRF8_WT_Up |
| 23832     | Xcr1          | 346.66    | 3.85             | 1.15E-12   | NO           | IRF8_WT_Up |
| 240047    | Mmp25         | 67.50     | 3.78             | 7.23E-04   | NO           | IRF8_WT_Up |
| 72386     | 2610035D17Rik | 152.95    | 3.74             | 7.23E-03   | NO           | IRF8_WT_Up |
| 16425     | Itih2         | 57.81     | 3.69             | 2.98E-03   | NO           | IRF8_WT_Up |
| 27007     | Klrk1         | 175.99    | 3.66             | 1.30E-08   | NO           | IRF8_WT_Up |
| 16182     | Il18r1        | 197.47    | 3.60             | 2.51E-09   | NO           | IRF8_WT_Up |
| 170733    | Klra17        | 3407.29   | 3.59             | 1.84E-19   | YES          | IRF8_WT_Up |
| 77996     | Cutal         | 186.18    | 3.55             | 1.17E-06   | NO           | IRF8_WT_Up |
| 140795    | P2ry14        | 336.44    | 3.47             | 9.09E-07   | YES          | IRF8_WT_Up |
| 20856     | Stc2          | 453.51    | 3.44             | 5.89E-06   | YES          | IRF8_WT_Up |
| 170725    | Capn8         | 178.43    | 3.36             | 1.48E-05   | NO           | IRF8_WT_Up |
| 22329     | Vcam1         | 33053.12  | 3.35             | 8.44E-22   | YES          | IRF8_WT_Up |
| 208659    | Fam20a        | 447.60    | 3.33             | 1.34E-15   | YES          | IRF8_WT_Up |
| 20307     | Ccl8          | 184.28    | 3.31             | 1.03E-05   | YES          | IRF8_WT_Up |
| 320463    | F630111L10Rik | 695.66    | 3.26             | 7.11E-21   | NO           | IRF8_WT_Up |
| 17063     | Muc13         | 61.30     | 3.24             | 4.26E-02   | NO           | IRF8_WT_Up |
| 17174     | Masp1         | 106.55    | 3.24             | 4.01E-05   | NO           | IRF8_WT_Up |
| 20512     | Slc1a3        | 130.85    | 3.15             | 4.20E-03   | NO           | IRF8_WT_Up |
| 67859     | Cysrt1        | 94.28     | 3.14             | 3.28E-02   | YES          | IRF8_WT_Up |
| 17329     | Cxcl9         | 873.59    | 3.11             | 1.45E-08   | YES          | IRF8_WT_Up |
| 228677    | Sptlc3        | 96.86     | 3.08             | 1.47E-03   | NO           | IRF8_WT_Up |
| 622127    | Cyp3a57       | 131.32    | 3.07             | 1.72E-03   | NO           | IRF8_WT_Up |
| 13421     | Dnase1l3      | 2373.02   | 3.07             | 4.70E-25   | YES          | IRF8_WT_Up |
| 50722     | Dkk1          | 421.54    | 3.05             | 6.63E-08   | YES          | IRF8_WT_Up |
| 224794    | Enpp4         | 3834.86   | 3.04             | 1.70E-28   | YES          | IRF8_WT_Up |
| 12583     | Cdo1          | 635.18    | 3.04             | 2.10E-07   | YES          | IRF8_WT_Up |
| 11936     | Fxyd2         | 275.76    | 2.96             | 2.43E-05   | YES          | IRF8_WT_Up |
| 246278    | Cd207         | 2640.84   | 2.93             | 2.16E-07   | YES          | IRF8_WT_Up |
| 229672    | Bcl2l15       | 128.90    | 2.92             | 1.31E-03   | NO           | IRF8_WT_Up |
| 19417     | Rasgrf1       | 120.28    | 2.91             | 7.74E-04   | NO           | IRF8_WT_Up |
| 16197     | Il7r          | 1616.13   | 2.91             | 1.31E-11   | YES          | IRF8_WT_Up |
| 232406    | BC035044      | 326.52    | 2.88             | 1.88E-07   | YES          | IRF8_WT_Up |
| 13034     | Ctse          | 1989.68   | 2.85             | 5.51E-09   | YES          | IRF8_WT_Up |
| 54120     | Gipc2         | 438.02    | 2.81             | 3.90E-05   | YES          | IRF8_WT_Up |
| 12903     | Crabp1        | 83.95     | 2.79             | 1.12E-02   | YES          | IRF8_WT_Up |
| 80782     | Klrb1b        | 4938.78   | 2.79             | 3.30E-06   | YES          | IRF8_WT_Up |
| 15375     | Foxa1         | 381.47    | 2.79             | 2.57E-07   | YES          | IRF8_WT_Up |
| 13482     | Dpp4          | 1222.46   | 2.76             | 9.61E-16   | YES          | IRF8_WT_Up |
| 232983    | Cxcl17        | 373.70    | 2.74             | 2.58E-04   | YES          | IRF8_WT_Up |
| 58187     | Cldn10        | 133.45    | 2.73             | 1.67E-03   | NO           | IRF8_WT_Up |
| 18566     | Pdcd1         | 1134.11   | 2.72             | 4.71E-14   | YES          | IRF8_WT_Up |
| 17390     | Mmp2          | 3902.35   | 2.71             | 1.19E-29   | YES          | IRF8_WT_Up |
| 76453     | Prss23        | 219.69    | 2.71             | 3.76E-05   | NO           | IRF8_WT_Up |
| 227485    | Cdh19         | 155.65    | 2.71             | 3.34E-04   | NO           | IRF8_WT_Up |
| 239081    | Tlr11         | 113.38    | 2.67             | 2.62E-03   | NO           | IRF8_WT_Up |
| 327766    | Tmem26        | 239.70    | 2.67             | 8.59E-04   | NO           | IRF8_WT_Up |
| 436440    | Gpr31b        | 672.72    | 2.66             | 6.58E-15   | YES          | IRF8_WT_Up |
| 13805     | Eng           | 238.84    | 2.66             | 1.46E-05   | NO           | IRF8_WT_Up |

|           |          |          |       |            |     |            |
|-----------|----------|----------|-------|------------|-----|------------|
| 73712     | Dmkn     | 142.10   | 2.65  | 6.42E-03   | NO  | IRF8_WT_Up |
| 329693    | Fcrl5    | 394.39   | 2.63  | 3.30E-05   | YES | IRF8_WT_Up |
| 107221    | Ffar4    | 322.65   | 2.60  | 5.88E-03   | YES | IRF8_WT_Up |
| 75345     | Slamf7   | 10812.11 | 2.60  | 6.01E-23   | YES | IRF8_WT_Up |
| 22417     | Wnt4     | 146.15   | 2.59  | 0.04982696 | NO  | IRF8_WT_Up |
| 277203    | Tm4sf19  | 215.78   | 2.53  | 5.56E-05   | YES | IRF8_WT_Up |
| 20304     | Ccl5     | 2044.03  | 2.49  | 9.54E-08   | YES | IRF8_WT_Up |
| 99571     | Fgg      | 1253.00  | 2.43  | 4.00E-07   | YES | IRF8_WT_Up |
| 16160     | Il12b    | 1433.41  | 2.42  | 4.02E-04   | YES | IRF8_WT_Up |
| 269346    | Slc28a2  | 110.72   | 2.39  | 5.19E-03   | NO  | IRF8_WT_Up |
| 231293    | Cwh43    | 189.81   | 2.39  | 1.43E-02   | NO  | IRF8_WT_Up |
| 100043899 | R3hdml   | 565.66   | 2.37  | 5.65E-04   | YES | IRF8_WT_Up |
| 17068     | Ly6d     | 2508.65  | 2.37  | 8.73E-06   | YES | IRF8_WT_Up |
| 81879     | Tfcp2l1  | 250.15   | 2.37  | 7.46E-03   | NO  | IRF8_WT_Up |
| 17702     | Msx2     | 123.97   | 2.37  | 3.60E-03   | NO  | IRF8_WT_Up |
| 110135    | Fgb      | 1693.86  | 2.36  | 3.79E-04   | YES | IRF8_WT_Up |
| 72778     | Dnajc22  | 76.49    | 2.33  | 0.04896159 | NO  | IRF8_WT_Up |
| 101320    | Dyrk4    | 333.81   | 2.32  | 1.59E-02   | YES | IRF8_WT_Up |
| 14066     | F3       | 3697.14  | 2.30  | 1.25E-08   | YES | IRF8_WT_Up |
| 83560     | Tex14    | 134.88   | 2.29  | 1.79E-02   | NO  | IRF8_WT_Up |
| 67596     | Tespa1   | 570.00   | 2.29  | 0.04773816 | YES | IRF8_WT_Up |
| 12389     | Cav1     | 309.18   | 2.28  | 9.30E-06   | NO  | IRF8_WT_Up |
| 22068     | Trpc6    | 108.17   | 2.27  | 2.83E-02   | NO  | IRF8_WT_Up |
| 17067     | Ly6c1    | 260.35   | 2.27  | 0.04801061 | YES | IRF8_WT_Up |
| 53311     | Mybph    | 140.97   | 2.27  | 3.48E-03   | NO  | IRF8_WT_Up |
| 30925     | Slamf6   | 2255.38  | 2.25  | 1.35E-05   | YES | IRF8_WT_Up |
| 246747    | Adig     | 124.97   | 2.23  | 1.48E-02   | YES | IRF8_WT_Up |
| 242122    | Vtcn1    | 542.99   | 2.22  | 3.51E-08   | YES | IRF8_WT_Up |
| 233529    | Kctd14   | 1035.89  | 2.21  | 8.18E-08   | YES | IRF8_WT_Up |
| 19418     | Rasgrf2  | 189.26   | 2.21  | 1.06E-02   | NO  | IRF8_WT_Up |
| 110454    | Ly6a     | 5863.84  | 2.20  | 5.78E-04   | YES | IRF8_WT_Up |
| 227618    | Lrrc26   | 249.06   | 2.20  | 2.09E-04   | YES | IRF8_WT_Up |
| 102502    | Pls1     | 207.39   | 2.18  | 7.27E-04   | NO  | IRF8_WT_Up |
| 17470     | Cd200    | 913.77   | 2.17  | 5.61E-07   | YES | IRF8_WT_Up |
| 69638     | Enho     | 606.03   | 2.14  | 3.19E-06   | YES | IRF8_WT_Up |
| 333605    | Frmpr4   | 128.11   | 2.14  | 8.54E-03   | NO  | IRF8_WT_Up |
| 50528     | Tmprss2  | 1156.85  | 2.13  | 1.32E-10   | YES | IRF8_WT_Up |
| 408064    | BC064078 | 339.19   | 2.13  | 7.74E-03   | YES | IRF8_WT_Up |
| 17863     | Myb      | 173.78   | 2.12  | 1.09E-02   | NO  | IRF8_WT_Up |
| 66857     | Pib1     | 26441.43 | 2.10  | 1.36E-06   | YES | IRF8_WT_Up |
| 14183     | Fgfr2    | 207.53   | 2.08  | 4.33E-04   | NO  | IRF8_WT_Up |
| 109676    | Ank2     | 164.31   | 2.08  | 1.51E-02   | NO  | IRF8_WT_Up |
| 99887     | Tmem56   | 974.38   | 2.07  | 1.19E-07   | YES | IRF8_WT_Up |
| 242894    | Actr3b   | 190.77   | 2.05  | 9.30E-03   | NO  | IRF8_WT_Up |
| 320051    | Exph5    | 128.34   | 2.05  | 2.63E-02   | NO  | IRF8_WT_Up |
| 101202    | Hepacam2 | 1748.85  | 2.05  | 3.21E-04   | YES | IRF8_WT_Up |
| 16918     | Mycl     | 445.71   | 2.04  | 6.50E-05   | NO  | IRF8_WT_Up |
| 20496     | Slc12a2  | 5282.71  | 2.02  | 1.09E-08   | YES | IRF8_WT_Up |
| 13175     | Dclk1    | 232.05   | -2.00 | 0.04694339 | NO  | IRF8_KO_Up |
| 67122     | Nrarp    | 192.85   | -2.02 | 4.11E-03   | NO  | IRF8_KO_Up |
| 15559     | Htr2b    | 387.93   | -2.02 | 1.21E-02   | YES | IRF8_KO_Up |
| 320664    | Cass4    | 194.32   | -2.02 | 3.82E-03   | NO  | IRF8_KO_Up |
| 233046    | Rasgrp4  | 776.03   | -2.03 | 2.80E-07   | NO  | IRF8_KO_Up |
| 67971     | Tppp3    | 670.77   | -2.05 | 1.90E-05   | YES | IRF8_KO_Up |
| 54670     | Atp8b1   | 262.50   | -2.09 | 9.30E-03   | NO  | IRF8_KO_Up |
| 99010     | Lpcat4   | 4026.73  | -2.10 | 4.49E-06   | YES | IRF8_KO_Up |
| 11497     | Adam3    | 130.98   | -2.13 | 2.47E-02   | NO  | IRF8_KO_Up |
| 18436     | P2rx1    | 135.94   | -2.15 | 5.75E-03   | NO  | IRF8_KO_Up |
| 229595    | Adamts14 | 1691.84  | -2.15 | 4.00E-05   | YES | IRF8_KO_Up |
| 320365    | Fry      | 441.91   | -2.26 | 5.41E-07   | NO  | IRF8_KO_Up |
| 16985     | Lsp1     | 17815.50 | -2.26 | 6.58E-09   | YES | IRF8_KO_Up |
| 14276     | Folr2    | 316.66   | -2.27 | 2.40E-02   | YES | IRF8_KO_Up |
| 380839    | Serp1b1c | 114.80   | -2.28 | 0.04447185 | NO  | IRF8_KO_Up |
| 14089     | Fap      | 513.77   | -2.28 | 2.59E-05   | NO  | IRF8_KO_Up |
| 19401     | Rara     | 1076.66  | -2.29 | 3.11E-12   | YES | IRF8_KO_Up |
| 18726     | Lilra6   | 137.42   | -2.29 | 1.14E-02   | NO  | IRF8_KO_Up |
| 18074     | Nid2     | 456.23   | -2.37 | 1.18E-04   | NO  | IRF8_KO_Up |
| 56620     | Clec4n   | 37382.99 | -2.38 | 2.50E-12   | YES | IRF8_KO_Up |
| 108115    | Slco4a1  | 729.21   | -2.42 | 1.34E-12   | YES | IRF8_KO_Up |
| 15446     | Hpgd     | 14020.70 | -2.43 | 4.10E-16   | YES | IRF8_KO_Up |
| 67198     | Spats2l  | 458.77   | -2.44 | 1.29E-04   | NO  | IRF8_KO_Up |
| 381484    | Gm5150   | 443.50   | -2.48 | 1.04E-05   | YES | IRF8_KO_Up |

|           |               |          |        |          |                              |            |
|-----------|---------------|----------|--------|----------|------------------------------|------------|
| 15248     | Hic1          | 990.90   | -2.51  | 6.06E-16 | YES                          | IRF8_KO_Up |
| 233186    | Siglecf       | 1046.83  | -2.53  | 5.23E-15 | YES                          | IRF8_KO_Up |
| 100042480 | Nhsl2         | 107.39   | -2.54  | 1.73E-02 | NO                           | IRF8_KO_Up |
| 18830     | Pltp          | 3762.93  | -2.55  | 4.74E-16 | YES                          | IRF8_KO_Up |
| 16971     | Lrp1          | 12992.98 | -2.59  | 7.93E-08 | YES                          | IRF8_KO_Up |
| 246049    | Slc36a2       | 291.04   | -2.60  | 6.51E-05 | NO                           | IRF8_KO_Up |
| 232975    | Atp1a3        | 2882.45  | -2.61  | 3.51E-08 | YES                          | IRF8_KO_Up |
| 246707    | Emilin2       | 3437.51  | -2.61  | 2.52E-13 | YES                          | IRF8_KO_Up |
| 18670     | Abcb4         | 308.73   | -2.63  | 1.18E-06 | NO                           | IRF8_KO_Up |
| 19201     | Pstpip2       | 715.77   | -2.67  | 5.55E-11 | YES                          | IRF8_KO_Up |
| 18795     | Plcb1         | 742.41   | -2.68  | 1.13E-10 | NO                           | IRF8_KO_Up |
| 11871     | Art2a-ps      | 1084.44  | -2.68  | 3.76E-15 | YES                          | IRF8_KO_Up |
| 58860     | Adamdec1      | 10281.63 | -2.71  | 2.42E-12 | YES                          | IRF8_KO_Up |
| 110095    | Pygl          | 2017.06  | -2.72  | 4.18E-11 | YES                          | IRF8_KO_Up |
| 18132     | Notch4        | 459.52   | -2.74  | 1.43E-08 | NO                           | IRF8_KO_Up |
| 80891     | Fcrls         | 36353.13 | -2.74  | 3.23E-10 | YES                          | IRF8_KO_Up |
| 17001     | Ltc4s         | 3147.58  | -2.74  | 2.13E-09 | YES                          | IRF8_KO_Up |
| 235135    | Tmem45b       | 135.03   | -2.76  | 1.60E-02 | NO                           | IRF8_KO_Up |
| 319446    | Dpep2         | 5496.37  | -2.80  | 1.25E-30 | YES                          | IRF8_KO_Up |
| 14544     | Gda           | 755.83   | -2.84  | 1.56E-14 | YES                          | IRF8_KO_Up |
| 12268     | C4b           | 1794.00  | -2.86  | 5.09E-05 | YES                          | IRF8_KO_Up |
| 93721     | Cpn1          | 75.02    | -2.87  | 3.45E-02 | NO                           | IRF8_KO_Up |
| 193385    | Fam65b        | 383.33   | -2.95  | 6.69E-09 | NO                           | IRF8_KO_Up |
| 13449     | Dok2          | 646.69   | -2.96  | 7.19E-05 | YES                          | IRF8_KO_Up |
| 378460    | Pram1         | 1352.05  | -2.97  | 2.34E-11 | YES                          | IRF8_KO_Up |
| 16364     | Irf4          | 450.71   | -2.97  | 3.05E-06 | YES                          | IRF8_KO_Up |
| 105841    | Dennd3        | 190.00   | -3.00  | 2.39E-06 | NO                           | IRF8_KO_Up |
| 58223     | Mmp19         | 199.59   | -3.00  | 6.17E-07 | NO                           | IRF8_KO_Up |
| 70882     | Armc3         | 73.20    | -3.10  | 1.55E-03 | NO                           | IRF8_KO_Up |
| 58217     | Trem1         | 3055.13  | -3.10  | 1.17E-23 | YES                          | IRF8_KO_Up |
| 14058     | F10           | 125.49   | -3.14  | 1.12E-02 | NO                           | IRF8_KO_Up |
| 320472    | Ppm1e         | 57.99    | -3.14  | 9.92E-03 | NO                           | IRF8_KO_Up |
| 57349     | Pbbp          | 104.15   | -3.21  | 4.00E-02 | YES                          | IRF8_KO_Up |
| 72014     | Btbd17        | 51.76    | -3.25  | 1.63E-02 | NO                           | IRF8_KO_Up |
| 14745     | Lpar1         | 370.79   | -3.28  | 8.69E-05 | YES                          | IRF8_KO_Up |
| 100040525 | Tmem181c-ps   | 162.40   | -3.33  | 1.56E-07 | NO                           | IRF8_KO_Up |
| 12156     | Bmp2          | 191.02   | -3.40  | 7.93E-07 | NO                           | IRF8_KO_Up |
| 58218     | Trem3         | 259.86   | -3.45  | 1.19E-07 | YES                          | IRF8_KO_Up |
| 13601     | Ecm1          | 3756.70  | -3.55  | 1.32E-09 | YES                          | IRF8_KO_Up |
| 74403     | 4933400F21Rik | 55.26    | -3.57  | 1.04E-02 | NO                           | IRF8_KO_Up |
| 320802    | Ifitm10       | 491.03   | -3.62  | 4.87E-14 | YES                          | IRF8_KO_Up |
| 13730     | Emp1          | 9987.15  | -3.66  | 6.17E-24 | YES                          | IRF8_KO_Up |
| 16012     | Igfbp6        | 54.58    | -3.72  | 4.69E-03 | NO                           | IRF8_KO_Up |
| 52614     | Adgre4        | 2015.90  | -3.75  | 3.33E-20 | YES                          | IRF8_KO_Up |
| 12977     | Csf1          | 3822.52  | -3.95  | 6.48E-44 | YES                          | IRF8_KO_Up |
| 17394     | Mmp8          | 240.43   | -3.99  | 1.30E-08 | YES                          | IRF8_KO_Up |
| 11770     | Fabp4         | 200.02   | -4.06  | 8.75E-03 | YES                          | IRF8_KO_Up |
| 110197    | Dgkg          | 88.73    | -4.06  | 6.03E-06 | NO                           | IRF8_KO_Up |
| 19395     | Rasgrp2       | 76.63    | -4.26  | 3.42E-04 | NO                           | IRF8_KO_Up |
| 14608     | Gpr83         | 54.41    | -4.30  | 2.53E-02 | NO                           | IRF8_KO_Up |
| 16174     | Il18rap       | 206.76   | -4.31  | 1.02E-13 | NO                           | IRF8_KO_Up |
| 212073    | Syne3         | 107.26   | -4.34  | 4.89E-06 | NO                           | IRF8_KO_Up |
| 11689     | Alox5         | 475.90   | -4.36  | 3.27E-26 | YES                          | IRF8_KO_Up |
| 14468     | Gbp2b         | 856.91   | -4.57  | 2.73E-21 | YES                          | IRF8_KO_Up |
| 78558     | Htra3         | 5130.67  | -4.73  | 4.87E-44 | YES                          | IRF8_KO_Up |
| 232345    | A2m           | 86.69    | -4.86  | 7.78E-03 | NO                           | IRF8_KO_Up |
| 381680    | Nxpe5         | 1027.38  | -5.00  | 1.42E-25 | YES                          | IRF8_KO_Up |
| 14133     | Fcna          | 342.85   | -5.31  | 1.32E-16 | YES                          | IRF8_KO_Up |
| 12274     | C6            | 418.48   | -5.47  | 3.90E-16 | YES                          | IRF8_KO_Up |
| 121021    | Cspg4         | 251.91   | -5.71  | 1.08E-16 | NO                           | IRF8_KO_Up |
| 654812    | Angptl7       | 1530.27  | -5.86  | 2.29E-02 | YES                          | IRF8_KO_Up |
| 242248    | Bank1         | 1180.18  | -5.94  | 2.15E-24 | YES                          | IRF8_KO_Up |
| 14268     | Fn1           | 7502.83  | -6.42  | 3.54E-61 | YES                          | IRF8_KO_Up |
| 26388     | Ifi202b       | 600.97   | -6.43  | 2.51E-02 | YES                          | IRF8_KO_Up |
| 381924    | Itgad         | 750.84   | -6.51  | 3.16E-44 | YES                          | IRF8_KO_Up |
| 278180    | Vsig4         | 56.69    | -7.84  | 1.78E-03 | NO                           | IRF8_KO_Up |
| 668727    | Mrgpra2a      | 216.31   | -8.23  | 1.62E-14 | YES                          | IRF8_KO_Up |
| 16429     | Itln1         | 219.86   | -24.62 | 2.31E-05 | YES                          | IRF8_KO_Up |
| 72147     | Zbtb46        | 88.67    | -1.21  | 0.83     | Not differentially expressed | Neither    |

| Table S3. Ingenuity Pathway Analysis (IPA) for <i>Irf8<sup>f/f</sup></i> versus <i>CD11c<sup>Cre</sup>Irf8<sup>f/f</sup></i> TAMs, related to Figure 3 |               |        |       |                                                                                                                                                                                                                                                                                                                                            |
|--------------------------------------------------------------------------------------------------------------------------------------------------------|---------------|--------|-------|--------------------------------------------------------------------------------------------------------------------------------------------------------------------------------------------------------------------------------------------------------------------------------------------------------------------------------------------|
| Ingenuity Canonical Pathways                                                                                                                           | -log(p-value) | zScore | Ratio | Molecules                                                                                                                                                                                                                                                                                                                                  |
| Th1 Pathway                                                                                                                                            | 1.05E+01      | 2.414  | .252  | IRF1,FGFR2,NFATC2,HLA-DQA1,PIK3R5,CD40,IFNAR1,CD274,IL10RA,CCR5,IFNGR1,STAT3,PIK3CD,STAT1,HLA-DRB5,HLA-DMB,CD4,IL12B,NFIL3,CD86,IL18R1,APH1B,NFKB1,HLA-DOA,NOTCH1,HLA-DQB1,ICOSLG/LOC102723996,HLA-DOB,NOTCH4,NFATC1,CXCR3,HLA-A,DLL1,PSEN2                                                                                                |
| Neuro-inflammation Signaling Pathway                                                                                                                   | 8.53E+00      | 2.429  | .167  | CX3CR1,NFATC2,TNFRSF1A,HLA-DQA1,TLR1,PIK3R5,TLR4,IFNGR1,GABRA4,PIK3CD,Tlr12,HLA-DRB5,IL12B,TLR2,CD86,APH1B,TLR7,CCL5,HLA-DQB1,HLA-DOB,CD200R1,TGFBR2,GABBR2,CREB3L4,CYBB,CD200,IKBKE,JUN,FGFR2,MYD88,CD40,TREM2,IRAK3,VCAM1,IRF7,STAT1,HLA-DMB,CREBBP,SLC1A3,MAPK3,TGFB3,NFKB1,HLA-DOA,PPP3CA,NFATC1,HMOX1,HLA-A,TLR3,PSEN2,CCL2,Tlr11,GLS |
| Dendritic Cell Maturation                                                                                                                              | 7.78E+00      | 0.507  | .191  | FGFR2,IL15,MYD88,TNFRSF1A,HLA-DQA1,PIK3R5,CD40,TREM2,NFKBIA,IFNAR1,NFKBID,TLR4,IL23A,CD83,IRF8,PIK3CD,STAT1,HLA-DRB5,HLA-DMB,CREBBP,IL12B,TLR2,CD86,LTB,MAPK3,PLCB1,NFKB1,HLA-DOA,HLA-DQB1,PLCB4,HLA-DOB,HLA-A,CREB3L4,TLR3,COL11A2,FCGR3A/FCGR3B,IKBKE                                                                                    |
| TREM1 Signaling                                                                                                                                        | 7.64E+00      | 1.091  | .280  | NFKB1,TLR7,MYD88,TLR1,NLRC3,NLRC5,CD40,TLR4,CD83,STAT3,TLR3,Tlr12,CCL2,TREM1,CXCL3,TLR2,CD86,ITGA5,Tlr11,CIITA,MAPK3                                                                                                                                                                                                                       |
| PPAR $\alpha$ /RXR $\alpha$ Activation                                                                                                                 | 6.59E+00      | 0.365  | .183  | JUN,ACADL,PRKAR2B,FASN,BCL3,IL1R2,MAP2K1,NFKBIA,NFKBID,NCOA3,ADCY3,PRKCB,RXRA,ADIPOR2,CREBBP,HSP90AA1,MAPK3,PLCB1,TGFB3,MAP4K4,NFKB1,PLCB4,INSR,ACAA1,HELZ2,TGFBR2,PRKCA,IL18RAP,LPL,PRKAG1,HSP90AB1,ADCY9,IKBKE                                                                                                                           |
| Activation of IRF by Cytosolic Pattern Recognition Receptors                                                                                           | 5.36E+00      | 1.5    | .254  | JUN,TANK,NFKB1,DDX58,IFIT2,CD40,FADD,NFKBIA,IFNAR1,NFKBID,IRF7,STAT1,IFIH1,CREBBP,ZBP1,IKBKE                                                                                                                                                                                                                                               |

| <b>Table S4. Ingenuity Pathway Analysis (IPA) for TAMs versus DC1, related to Figure 4</b> |               |        |       |                                                                                                                                                                                          |
|--------------------------------------------------------------------------------------------|---------------|--------|-------|------------------------------------------------------------------------------------------------------------------------------------------------------------------------------------------|
| Ingenuity Canonical Pathways                                                               | -log(p-value) | zScore | Ratio | Molecules                                                                                                                                                                                |
| STAT3 Pathway                                                                              | 5.35E+00      | 1.5    | .163  | FGFR1,FGFR3,HGF,IGF1R,IGF2R,IL10RB,IL12RB1,IL12RB2,IL1A,IL1RL2,IL21R,IL27RA,IL2RA,IL4R,IL7R,JAK2,PDGFB,SOCS3, SRC, TGFB1, TGFB2, VEGFA                                                   |
| cAMP-Mediated Signaling                                                                    | 4.63E+00      | 1.3    | .127  | ADCY3,ADCY6,ADORA2A,ADRB1,ADRB2,CAMK1,CREB3L3,CREB5,CREM,DUSP4,DUSP6,DUSP9,GABBR1,GABBR2,GDPD1,HCAR2,HTR7,LTB4R,P2RY12,P2RY13,PDE1B,PDE7B,PRKAR1B,PRKAR2B,PTGER2,RGS18,S1PR1, SRC, VIPR1 |
| T Cell Exhaustion Signaling Pathway                                                        | 4.47E+00      | 0.65   | .137  | AKT3,BTLA,CTLA4,FCER1G,HLA-DMB,HLA-DOA,HLA-DOB,IL10,IL10RB,IL12B,IL12RB1,IL12RB2,IL6,IRF4,JAK2,LAG3, MGAT5,PDCD1LG2,PPM1J,PRDM1, STAT4, TGFB1, TGFB2, VEGFA                              |
| Th1                                                                                        | 5.58E+00      | -3.0   | .174  | CCR5,CD4,CD8A,CXCR3,H2-Eb2,HLA-DMB,HLA-DOA,HLA-DOB,IL10,IL10RB,IL12B,IL12RB1,IL12RB2,IL27RA,IL6,JAK2,KLRD1,NOTCH2,NOTCH4,SOCS3,STAT4                                                     |
| Th17 Activation Pathway                                                                    | 2.86E+00      | -0.8   | .143  | AHR,FCER1G,IL10,IL12B,IL12RB1,IL12RB2,IL21R,IL6,IRF4,JAK2,PTGER2,SOCS3,STAT4                                                                                                             |
| IL-23 Signaling Pathway                                                                    | 2.02E+00      | -2.4   | .159  | AKT3,IL12B,IL12RB1,IL12RB2,JAK2,SOCS3,STAT4                                                                                                                                              |



**Table S5. Differentially expressed genes between “a” and “b” clusters in scRNAseq, related to Figures 5 and S6**

| <b>2a vs 2b:<br/>Gene</b> | <b>P_val</b> | <b>Avg_diff</b> | <b>Pct. 1</b> | <b>Pct. 2</b> | <b>P_val_adj</b> |
|---------------------------|--------------|-----------------|---------------|---------------|------------------|
| Vps37b                    | 4.09E-75     | -5.23           | 0.37          | 0.91          | 1.23E-71         |
| Nr4a1                     | 8.79E-75     | -5.36           | 0.14          | 0.86          | 2.64E-71         |
| Junb                      | 1.01E-73     | -15.86          | 0.77          | 1.00          | 3.03E-70         |
| Pnrc1                     | 1.14E-67     | -3.20           | 0.62          | 0.98          | 3.42E-64         |
| Dnaja1                    | 2.75E-64     | -6.33           | 0.85          | 0.98          | 8.25E-61         |
| Tnfaip3                   | 4.73E-59     | -2.76           | 0.27          | 0.86          | 1.42E-55         |
| Ier2                      | 2.09E-57     | -3.69           | 0.54          | 0.92          | 6.26E-54         |
| Hspa8                     | 1.24E-52     | -17.01          | 1.00          | 1.00          | 3.73E-49         |
| Btg2                      | 9.70E-49     | -4.70           | 0.70          | 0.95          | 2.91E-45         |
| Btg1                      | 1.10E-47     | -5.47           | 0.91          | 0.99          | 3.30E-44         |
| Ifrd1                     | 6.14E-47     | -2.24           | 0.24          | 0.75          | 1.84E-43         |
| Ubc                       | 1.39E-44     | -6.19           | 0.84          | 0.99          | 4.17E-41         |
| Hsp90aa1                  | 7.18E-40     | -5.72           | 0.82          | 0.97          | 2.16E-36         |
| Nr4a3                     | 7.14E-39     | -1.43           | 0.02          | 0.55          | 2.14E-35         |
| Klf6                      | 1.07E-35     | -3.49           | 0.59          | 0.88          | 3.20E-32         |
| Dusp1                     | 1.35E-34     | -2.95           | 0.29          | 0.75          | 4.04E-31         |
| Icos                      | 2.68E-33     | -2.24           | 0.25          | 0.64          | 8.03E-30         |
| Tgif1                     | 9.83E-33     | -1.16           | 0.07          | 0.54          | 2.95E-29         |
| Fosl2                     | 7.28E-32     | -1.38           | 0.09          | 0.56          | 2.19E-28         |
| Ifngr1                    | 1.72E-31     | -3.62           | 0.90          | 0.97          | 5.17E-28         |
| Rgs1                      | 1.09E-30     | -8.29           | 0.79          | 0.97          | 3.27E-27         |
| Srgn                      | 1.87E-30     | -5.02           | 0.99          | 0.99          | 5.60E-27         |
| Hsp90ab1                  | 1.76E-29     | -8.67           | 1.00          | 1.00          | 5.29E-26         |
| Slc3a2                    | 3.04E-29     | -1.30           | 0.42          | 0.78          | 9.12E-26         |
| Coq10b                    | 5.86E-29     | -0.97           | 0.19          | 0.62          | 1.76E-25         |
| Clk1                      | 6.58E-29     | -1.03           | 0.32          | 0.70          | 1.97E-25         |
| Cd28                      | 9.69E-29     | -1.64           | 0.38          | 0.74          | 2.91E-25         |
| Rgs2                      | 1.03E-28     | -1.35           | 0.24          | 0.64          | 3.08E-25         |
| Ubald2                    | 1.06E-28     | -1.31           | 0.31          | 0.70          | 3.18E-25         |
| Rgcc                      | 4.48E-28     | -2.74           | 0.28          | 0.66          | 1.35E-24         |
| Dennd4a                   | 9.42E-28     | -1.32           | 0.52          | 0.83          | 2.83E-24         |
| Csrnp1                    | 1.23E-27     | -0.95           | 0.09          | 0.54          | 3.68E-24         |
| Neurl3                    | 1.46E-26     | -1.46           | 0.31          | 0.65          | 4.37E-23         |
| Zfp36l2                   | 2.49E-26     | -1.56           | 0.34          | 0.69          | 7.47E-23         |
| Crem                      | 4.78E-26     | -1.11           | 0.14          | 0.53          | 1.43E-22         |
| Arf4                      | 6.81E-25     | -1.11           | 0.54          | 0.81          | 2.04E-21         |
| Dnajb1                    | 3.80E-24     | -4.34           | 0.59          | 0.86          | 1.14E-20         |
| Gramd3                    | 1.02E-23     | -1.30           | 0.41          | 0.71          | 3.07E-20         |
| Jund                      | 1.89E-23     | -0.91           | 0.24          | 0.62          | 5.67E-20         |
| H3f3b                     | 1.35E-22     | -4.73           | 0.99          | 1.00          | 4.05E-19         |
| <b>3a vs 3b:<br/>Gene</b> | <b>P_val</b> | <b>Avg_diff</b> | <b>Pct. 1</b> | <b>Pct. 2</b> | <b>P_val_adj</b> |
| Hspa8                     | 1.11E-39     | -29.83          | 1.00          | 1.00          | 3.32E-36         |
| Hsp90ab1                  | 2.79E-34     | -20.02          | 1.00          | 1.00          | 8.38E-31         |
| Hsp90aa1                  | 5.11E-34     | -16.09          | 0.89          | 1.00          | 1.53E-30         |
| Dnajb1                    | 2.17E-32     | -16.92          | 0.64          | 0.94          | 6.51E-29         |
| Vps37b                    | 1.06E-29     | -5.38           | 0.50          | 0.89          | 3.17E-26         |
| Hspe1                     | 2.27E-28     | -7.85           | 0.91          | 0.96          | 6.81E-25         |
| Dnaja1                    | 2.94E-27     | -7.77           | 0.87          | 0.98          | 8.82E-24         |
| Hsph1                     | 5.96E-27     | -7.48           | 0.64          | 0.89          | 1.79E-23         |
| Hspd1                     | 2.79E-26     | -4.27           | 0.55          | 0.92          | 8.36E-23         |
| Tnfaip3                   | 1.58E-25     | -2.23           | 0.30          | 0.79          | 4.73E-22         |
| Ubc                       | 2.64E-25     | -9.91           | 0.91          | 0.98          | 7.92E-22         |
| Nr4a2                     | 7.54E-25     | -5.03           | 0.32          | 0.81          | 2.26E-21         |
| Junb                      | 9.68E-25     | -11.69          | 0.79          | 0.96          | 2.90E-21         |
| Hspa1b                    | 4.26E-23     | -10.09          | 0.63          | 0.89          | 1.28E-19         |

|                  |              |                 |               |               |                  |
|------------------|--------------|-----------------|---------------|---------------|------------------|
| Cd52             | 7.92E-22     | 10.39           | 1.00          | 1.00          | 2.38E-18         |
| Coq10b           | 8.90E-22     | -1.44           | 0.16          | 0.71          | 2.67E-18         |
| Klf6             | 2.58E-20     | -4.02           | 0.49          | 0.87          | 7.74E-17         |
| Hspa1a           | 4.45E-19     | -23.70          | 0.68          | 0.87          | 1.34E-15         |
| Pnrc1            | 1.04E-17     | -2.43           | 0.64          | 0.90          | 3.13E-14         |
| Clk1             | 1.46E-15     | -1.08           | 0.31          | 0.70          | 4.37E-12         |
| Nr4a1            | 2.31E-15     | -2.59           | 0.17          | 0.60          | 6.94E-12         |
| Ubb              | 1.43E-14     | -23.45          | 1.00          | 1.00          | 4.28E-11         |
| Dusp1            | 6.70E-14     | -4.14           | 0.39          | 0.72          | 2.01E-10         |
| Ier2             | 9.12E-14     | -1.53           | 0.51          | 0.83          | 2.74E-10         |
| Ifrd1            | 1.03E-13     | -1.63           | 0.24          | 0.59          | 3.09E-10         |
| Btg2             | 3.29E-13     | -3.37           | 0.73          | 0.90          | 9.86E-10         |
| Ifngr1           | 4.94E-13     | -2.73           | 0.74          | 0.91          | 1.48E-09         |
| Cacybp           | 1.48E-12     | -1.42           | 0.51          | 0.76          | 4.44E-09         |
| Rgs2             | 3.19E-12     | -1.21           | 0.14          | 0.54          | 9.56E-09         |
| Btg1             | 4.59E-12     | -3.68           | 0.96          | 0.97          | 1.38E-08         |
| Slc3a2           | 4.97E-12     | -1.95           | 0.47          | 0.72          | 1.49E-08         |
| Jund             | 7.44E-12     | -1.39           | 0.23          | 0.61          | 2.23E-08         |
| Nr4a3            | 9.51E-12     | -1.20           | 0.03          | 0.45          | 2.85E-08         |
| Ppp1r15a         | 1.06E-11     | -1.00           | 0.25          | 0.63          | 3.19E-08         |
| Gm26825          | 1.57E-11     | -1.79           | 0.39          | 0.66          | 4.71E-08         |
| Gpr132           | 1.60E-11     | -0.79           | 0.20          | 0.57          | 4.81E-08         |
| Ctla4            | 1.61E-11     | -1.31           | 0.19          | 0.54          | 4.82E-08         |
| Litaf            | 2.98E-11     | -2.11           | 0.67          | 0.79          | 8.95E-08         |
| Actb             | 5.04E-11     | 16.55           | 1.00          | 1.00          | 1.51E-07         |
| Dennd4a          | 5.64E-11     | -1.22           | 0.45          | 0.72          | 1.69E-07         |
| <b>5a vs 5b:</b> | <b>P_val</b> | <b>Avg_diff</b> | <b>Pct. 1</b> | <b>Pct. 2</b> | <b>P_val_adj</b> |
| <b>Gene</b>      |              |                 |               |               |                  |
| Vps37b           | 2.41E-53     | -8.05           | 0.67          | 0.99          | 7.22E-50         |
| Fosl2            | 1.86E-47     | -2.81           | 0.21          | 0.92          | 5.58E-44         |
| Junb             | 3.54E-42     | -18.99          | 0.81          | 0.99          | 1.06E-38         |
| Ifrd1            | 3.75E-34     | -2.91           | 0.46          | 0.88          | 1.13E-30         |
| P2ry10           | 6.48E-33     | -2.37           | 0.26          | 0.86          | 1.95E-29         |
| Nr4a2            | 9.05E-33     | -3.61           | 0.51          | 0.92          | 2.71E-29         |
| Neur13           | 6.12E-32     | -2.27           | 0.59          | 0.93          | 1.84E-28         |
| Ifngr1           | 8.34E-31     | -3.93           | 0.81          | 0.98          | 2.50E-27         |
| Crem             | 2.33E-27     | -2.50           | 0.28          | 0.80          | 6.99E-24         |
| Litaf            | 6.89E-27     | -3.04           | 0.93          | 0.99          | 2.07E-23         |
| Ier2             | 1.07E-25     | -2.33           | 0.63          | 0.93          | 3.21E-22         |
| Nr4a3            | 1.13E-24     | -1.36           | 0.12          | 0.65          | 3.38E-21         |
| Tnfaip3          | 6.09E-23     | -1.94           | 0.48          | 0.84          | 1.83E-19         |
| Stat3            | 7.63E-21     | -1.64           | 0.70          | 0.88          | 2.29E-17         |
| Nr4a1            | 9.07E-20     | -1.51           | 0.37          | 0.75          | 2.72E-16         |
| Hilpda           | 8.06E-19     | -2.15           | 0.10          | 0.61          | 2.42E-15         |
| Ubal2            | 1.07E-18     | -1.12           | 0.44          | 0.73          | 3.22E-15         |
| D16Ert472e       | 5.03E-18     | -1.08           | 0.32          | 0.75          | 1.51E-14         |
| Coq10b           | 6.56E-18     | -1.00           | 0.29          | 0.77          | 1.97E-14         |
| Errfi1           | 9.04E-18     | -2.05           | 0.22          | 0.67          | 2.71E-14         |
| Arf4             | 9.19E-18     | -1.98           | 0.77          | 0.92          | 2.76E-14         |
| Fth1             | 4.41E-17     | -7.05           | 1.00          | 1.00          | 1.32E-13         |
| Ppp1r3b          | 4.48E-17     | -0.80           | 0.12          | 0.63          | 1.34E-13         |
| Tnfrsf1b         | 5.49E-17     | -1.24           | 0.26          | 0.71          | 1.65E-13         |
| Dennd4a          | 7.62E-17     | -1.71           | 0.74          | 0.91          | 2.28E-13         |
| Spin2c           | 9.15E-17     | 0.28            | 0.24          | 0.06          | 2.74E-13         |
| Vgll4            | 1.71E-16     | -1.15           | 0.45          | 0.78          | 5.14E-13         |
| Dnaja1           | 2.49E-16     | -3.51           | 0.84          | 0.98          | 7.48E-13         |
| Bcl2l11          | 3.62E-16     | -1.41           | 0.46          | 0.82          | 1.09E-12         |
| Dgat1            | 4.05E-16     | -1.05           | 0.09          | 0.57          | 1.21E-12         |
| Ltb              | 1.04E-15     | 1.88            | 0.89          | 0.60          | 3.12E-12         |
| Rgs2             | 5.06E-15     | -1.55           | 0.56          | 0.87          | 1.52E-11         |

|          |          |       |      |      |          |
|----------|----------|-------|------|------|----------|
| Serpib6b | 7.94E-15 | -2.80 | 0.39 | 0.71 | 2.38E-11 |
| Gimap7   | 9.44E-15 | 1.04  | 0.80 | 0.44 | 2.83E-11 |
| Ldlrad4  | 1.70E-14 | -1.27 | 0.30 | 0.68 | 5.09E-11 |
| Cytip    | 3.03E-14 | -1.47 | 0.81 | 0.92 | 9.08E-11 |
| Isy1     | 4.81E-14 | -1.00 | 0.28 | 0.71 | 1.44E-10 |
| Gimap6   | 6.39E-14 | 1.13  | 0.92 | 0.68 | 1.92E-10 |
| Sqstm1   | 1.13E-13 | -1.65 | 0.81 | 0.94 | 3.40E-10 |
| Tpm4     | 1.49E-13 | -0.98 | 0.45 | 0.70 | 4.46E-10 |
